# Supplementary material for: Identifying DNase I hypersensitive sites as driver distal regulatory elements in breast cancer
Source: PubMed Central journal article supplement (PMC5585396; doi:10.1038/s41467-017-00100-x), 2017-09-05
Supplement: 41467_2017_100_MOESM1_ESM.pdf [file 41467_2017_100_MOESM1_ESM.pdf]

Type of file: pdf  
Size of file: 0 KB  
Title of file for HTML: Supplementary Information  
Description: Supplementary Figures, Supplementary Tables and Supplementary References.

Type of file: XLSX  
Size of file: 0 KB  
Title of file for HTML: Supplementary Data 1  
Description: All mutated loci in the 47 TCGA discovery samples.

Type of file: XLSX  
Size of file: 0 KB  
Title of file for HTML: Supplementary Data 2  
Description: The number and type of mutations for all 3,147 genes mutated in the 47 discovery samples.

Type of file: XLSX  
Size of file: 0 KB  
Title of file for HTML: Supplementary Data 3  
Description: Enrichment p-values for each mutated DHSs.

Type of file: XLSX  
Size of file: 0 KB  
Title of file for HTML: Supplementary Data 4  
Description: The clusters created to determine which DHSs are mutated at higher levels than expected.

Type of file: XLSX  
Size of file: 0 KB  
Title of file for HTML: Supplementary Data 5  
Description: The sequencing quality for all the DHSs passing Filter 1. 41 DHSs were excluded from further analyses because of poor sequencing quality.

Type of file: XLSX  
Size of file: 0 KB  
Title of file for HTML: Supplementary Data 6  
Description: The associations between each mutated DHS and the expression levels of its target genes.

Type of file: XLSX  
Size of file: 0 KB  
Title of file for HTML: Supplementary Data 7  
Description: All mutated loci in the 50 TCGA replication samples.

Type of file: XLSX  
Size of file: 0 KB

Title of file for HTML: Supplementary Data 8

Description: All mutations detected in 12 known cancer genes in the replication samples.

Type of file: XLSX

Size of file: 0 KB

Title of file for HTML: Supplementary Data 9

Description: All mutations detected in the putative driver DHSs in the prevalence screen.

Type of file: XLSX

Size of file: 0 KB

Title of file for HTML: Supplementary Data 10

Description: The enrichment for mutations in each putative driver DHS in comparison its flanking 100 kb.

Type of file: XLSX

Size of file: 0 KB

Title of file for HTML: Supplementary Data 11

Description: All the mutations in the TERT promoter identified in TCGA.

Type of file: XLSX

Size of file: 0 KB

Title of file for HTML: Supplementary Data 12

Description: The sequencing statistics (including total number of reads, duplicated and mapped reads) for all the 97 breast cancer samples from TCGA.

Type of file: XLSX

Size of file: 0 KB

Title of file for HTML: Supplementary Data 13

Description: The list of all amplicons used for targeted sequencing.

Type of file: XLSX

Size of file: 0 KB

Title of file for HTML: Supplementary Data 14

Description: The raw RNA-seq read counts for all genes within 2 Mb of the putative driver DHSs chr8:579137-581436 and 60 and chr20:62115827-62119284.

Type of file: pdf

Size of file: 0 KB

Title of file for HTML: Peer Review File

Description:

## Supplementary Figures

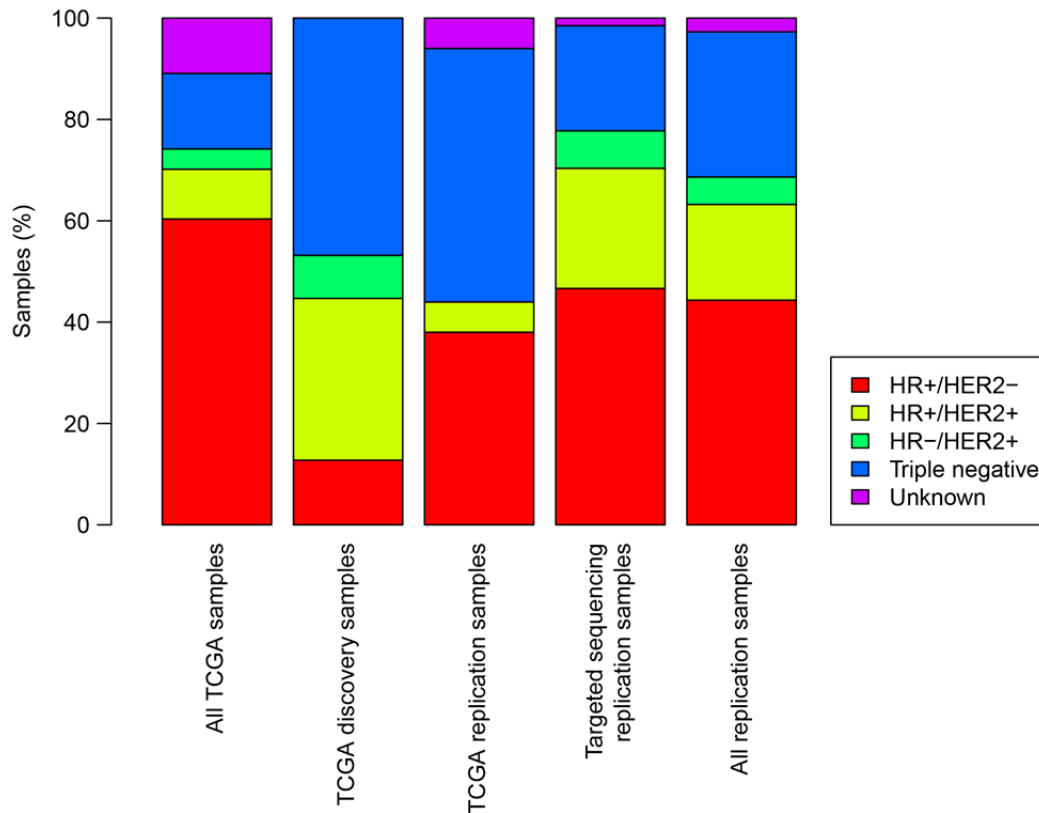

**Supplementary Figure 1: Breast cancer clinical phenotypes.** ER, PR and HER2 status for the 825 breast cancer samples in the TCGA “All TCGA samples”, the 47 TCGA whole-genome discovery samples and 50 TCGA whole-genome replication samples were obtained from the TCGA Data Portal (<https://tcga-data.nci.nih.gov/tcga/>). The ER, PR and HER2 status for the 135 targeted sequencing samples were obtained from patient records. Clinically relevant breast cancer phenotypes were derived from ER, PR and HER2 statuses as follows<sup>1</sup>: 1) HR+/HER2- contains tumors that are hormone receptor (HR) positive (+), i.e. ER+ and/or PR+, and HER2 negative (-); 2) HR+/HER2+ includes tumors that are ER+ and/or PR+ and HER2+; 3) HR-/HER2+ includes tumors that are ER- and PR- but HER2+; and 4) triple negative includes tumors that are ER-, PR- and HER2-. The distribution of clinical phenotypes across the replication samples “All replication samples” is the combined set of TCGA and targeted sequencing. Not dividing the breast cancer samples into subtypes provided greater sensitivity to detect driver DHSs that are potentially important across all clinically relevant phenotypes as well as in other epithelial cancers<sup>2-4</sup>.

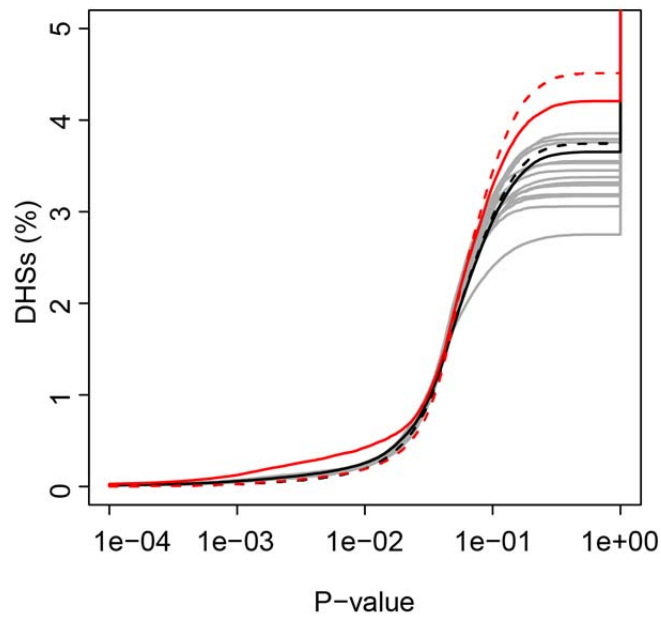

17  
 18  
 19 **Supplementary Figure 2: Cumulative distributions of test statistic  $p$ .** Cumulative distributions of  $p$  (Eq. 3) used in  
 20 Filter 1 for: 1) breast DHSs (red); 2) the 13 control tissues DHSs (one gray line for each); 3) “All control tissues” DHSs  
 21 represent the union of DHSs that are active in the 13 control tissues (black); 4) and 5) simulated mutations (i.e.  
 22 expectation under the model of neutral evolution) in breast and control tissues DHSs (dashed), respectively.  
 23  
 24

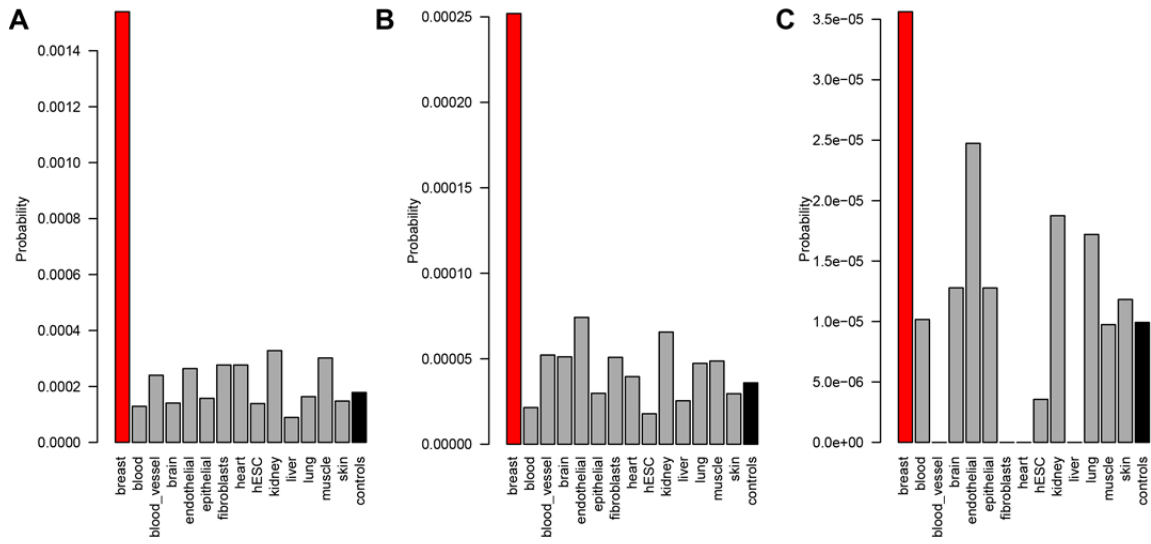

25  
26  
27  
28  
29  
30  
31

**Supplementary Figure 3: Comparisons between breast and control tissues DHSs at Filters 1-3.** The fraction of all DHSs passing (A) Filter 1 (significantly mutated DHSs), (B) Filters 1-3 (DHSs with aberrantly expressed targets), and (C) Filters 1-4 (DHSs with mutations in the replication samples) is shown for breast (red), the 13 control tissues (gray) and “All control tissues” combined (black). These plots show that a higher fraction of breast DHSs pass each filter, compared with control tissues DHSs.

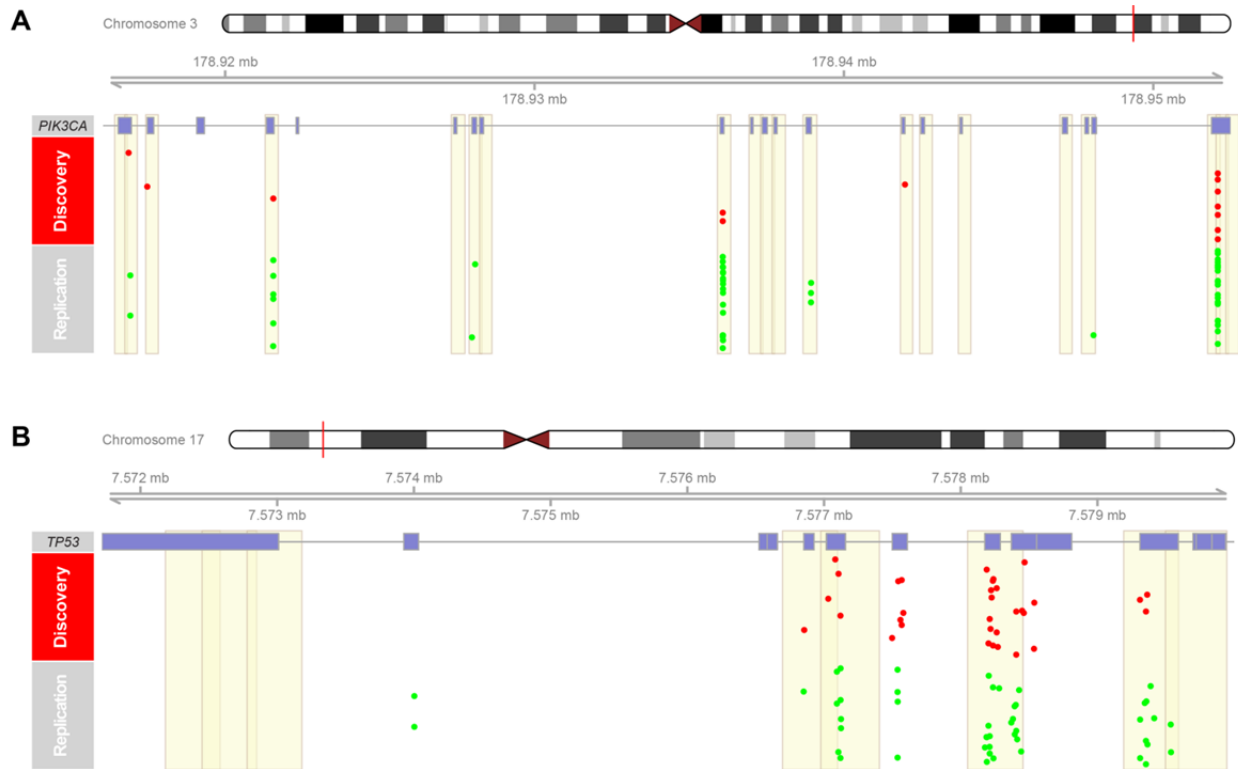

32 **Supplementary Figure 4: Mutation distribution in *PIK3CA* and *TP53* in discovery and replication breast cancer**  
 33 **samples.** The exons (blue) of *PIK3CA* (A) and *TP53* (B) covered by the amplicons used for targeted sequencing (yellow).  
 34 Mutations in the 47 discovery samples are depicted in red and in the 185 replication samples depicted in green. In the  
 35 replication samples 53 *PIK3CA* mutations (in 45 samples) and 47 *TP53* mutations (in 45 samples) were identified,  
 36 confirming that they are indeed mutated at high frequency (24.3%). Based on previous studies<sup>3</sup> we expected ~35% of  
 37 samples to harbor mutations in *TP53* but for technical reasons we did not assay exon 4, which is known to be highly  
 38 mutated, in the targeted sequencing. For instance exon 4 harbored 7 mutations in the discovery screening (14.8% of all  
 39 samples).

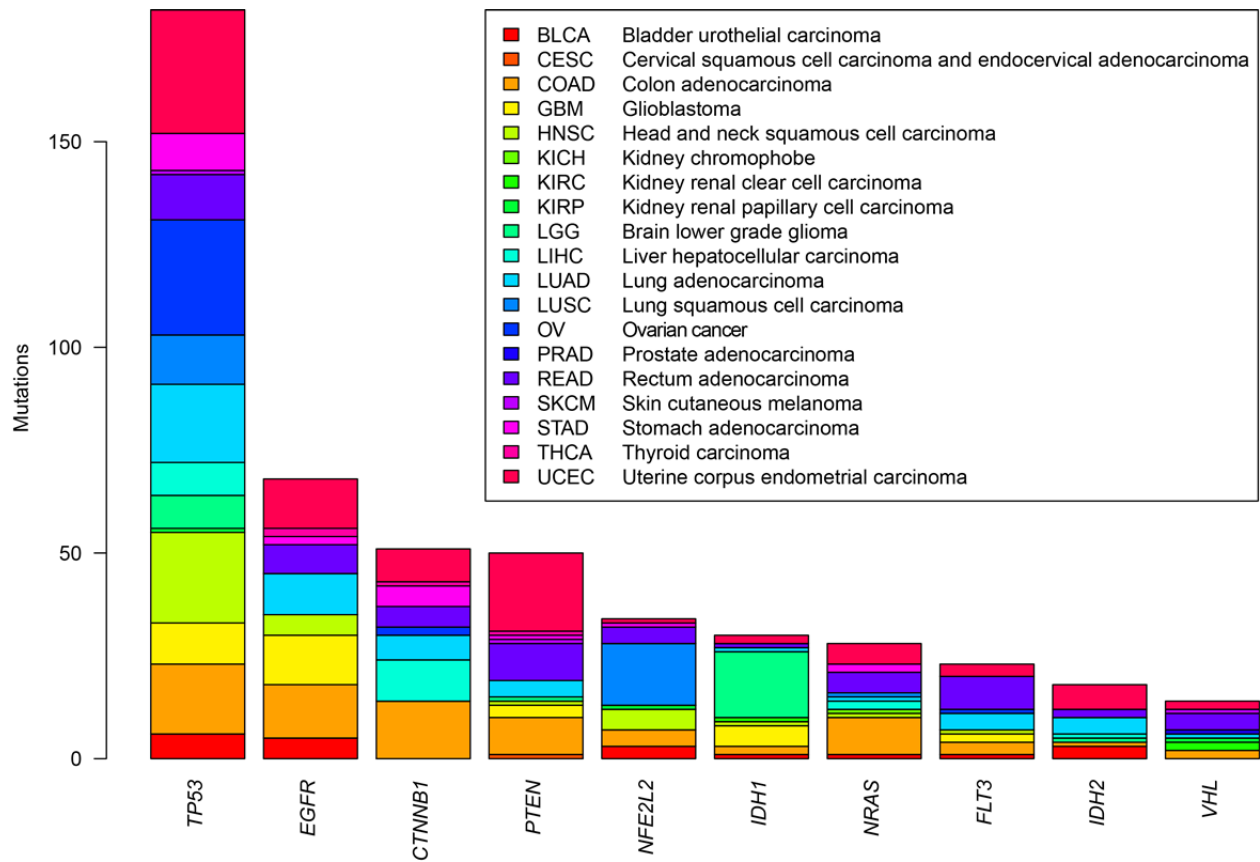

42  
 43 **Supplementary Figure 5: Mutation analysis by cancer type of ten genes found as significantly mutated in a recent**  
 44 **TCGA pan-cancer analysis.** The ten genes used in this analysis were retrieved from Tamborero *et al.*<sup>5</sup>. Somatic  
 45 mutations were detected in 1,097 samples from 19 tumor types. The number of samples of each cancer type is shown in  
 46 Figure 3B. *TP53* is the most mutated gene (182 mutations in 147 samples, 13.4% of all tumors). These data show that  
 47 GTFuse can be used to extract sequences of interest from tumor-normal pairs in CGHub<sup>6</sup> to detect mutations.  
 48

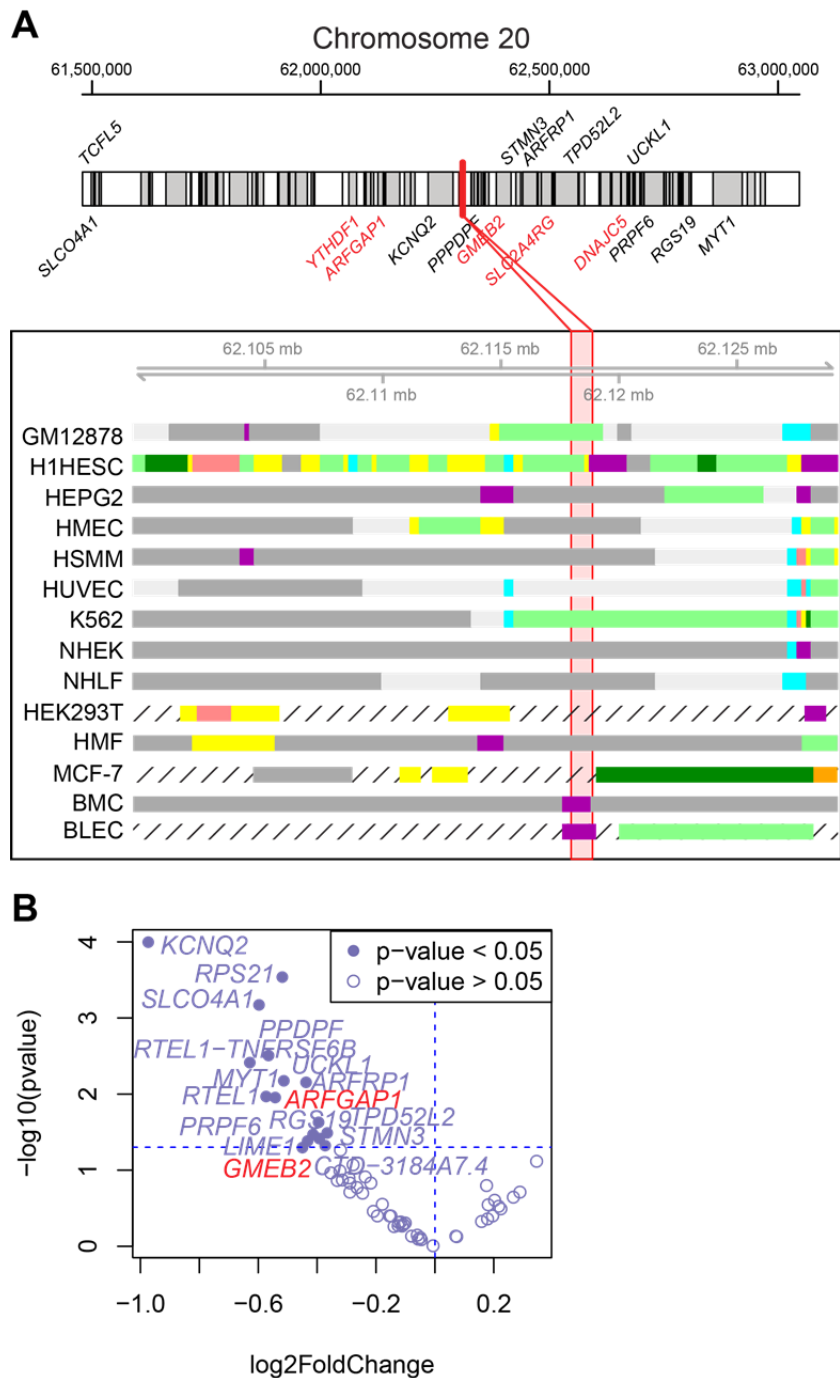

**Supplementary Figure 6: Deletion of putative driver DHS chr20:62115827-62119284 results in aberrant expression**

**of nearby genes.** (A) The relative positions of the deleted putative driver DHS chr20:62115827-62119284 (red) and the neighboring genes expressed in HEK293T are shown. Genes with altered expression associated with mutations and known interactions with the driver DHS in Filter 3 (Target genes) are indicated (red). The chromatin states in 14 cell lines associated with the deleted region are shown. (B) Volcano plot showing log<sub>2</sub> fold change and p-value of gene expression differences (genes within 1 Mb of the putative driver DHS chr20:62115827-62119284) between cells with deleted putative driver DHS and cells treated with empty vector. Target genes with significantly altered expression between the deleted and empty vector experiments are shown in red.



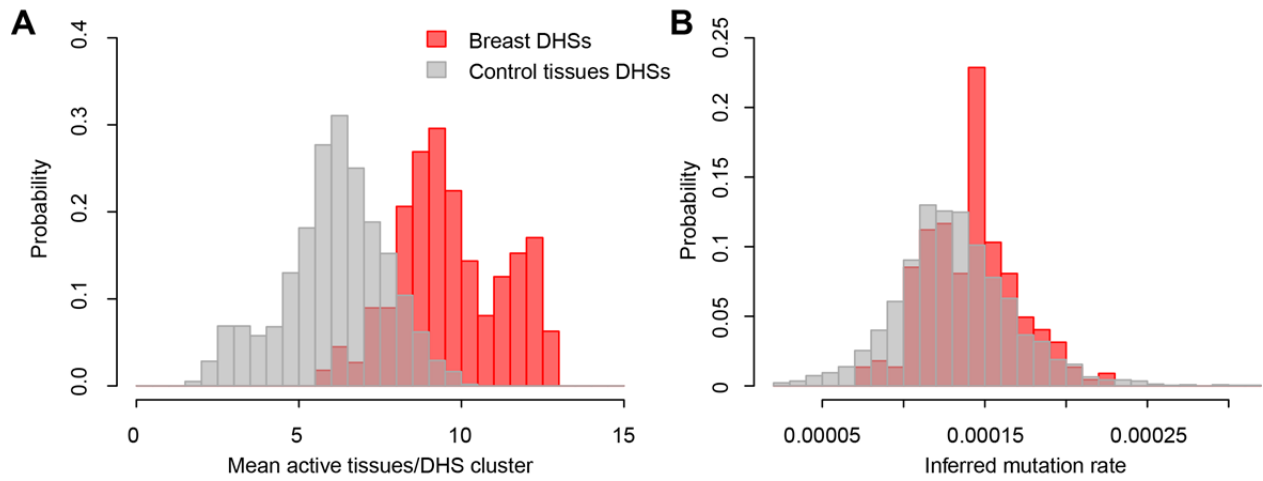

59  
60 **Supplementary Figure 7: Comparison of the number of tissues in which each DHS is active and  $\hat{\mu}$  between breast**  
61 **and control tissues DHSs.** (A) Histogram showing the distribution of the number of tissues in which each DHS is active,  
62 averaged by cluster. The plot shows that breast DHSs are expressed in significantly more tissues than DHSs active in  
63 control tissues ( $p\text{-value} = 2.27 \cdot 10^{-108}$ , Wilcoxon test). This is expected because we removed DHSs in the control tissues  
64 that overlap with breast DHSs. Therefore, constitutive DHSs are only included within the list of breast DHSs. The number  
65 of tissues in which each DHS is active was calculated by merging all DHSs from breast and all DHSs in the 13 control  
66 tissues, using the *mergeBed -c 4 -o count\_distinct* function in BedTools: the option *-c 4* refers to the BED files used as  
67 input, where the fourth column represents the tissue name; the option *-o count\_distinct* specifies that the output will  
68 include the counts of the number of distinct tissues associated with each set of overlapping DHSs. (B) Histogram showing  
69 the distribution of the inferred mutation probability for each cluster of DHSs. These plots show that, as expected, breast  
70 DHSs are active in a significantly higher number of tissues than control tissues DHSs, but this bias does not affect the  
71 inferred mutation rates.

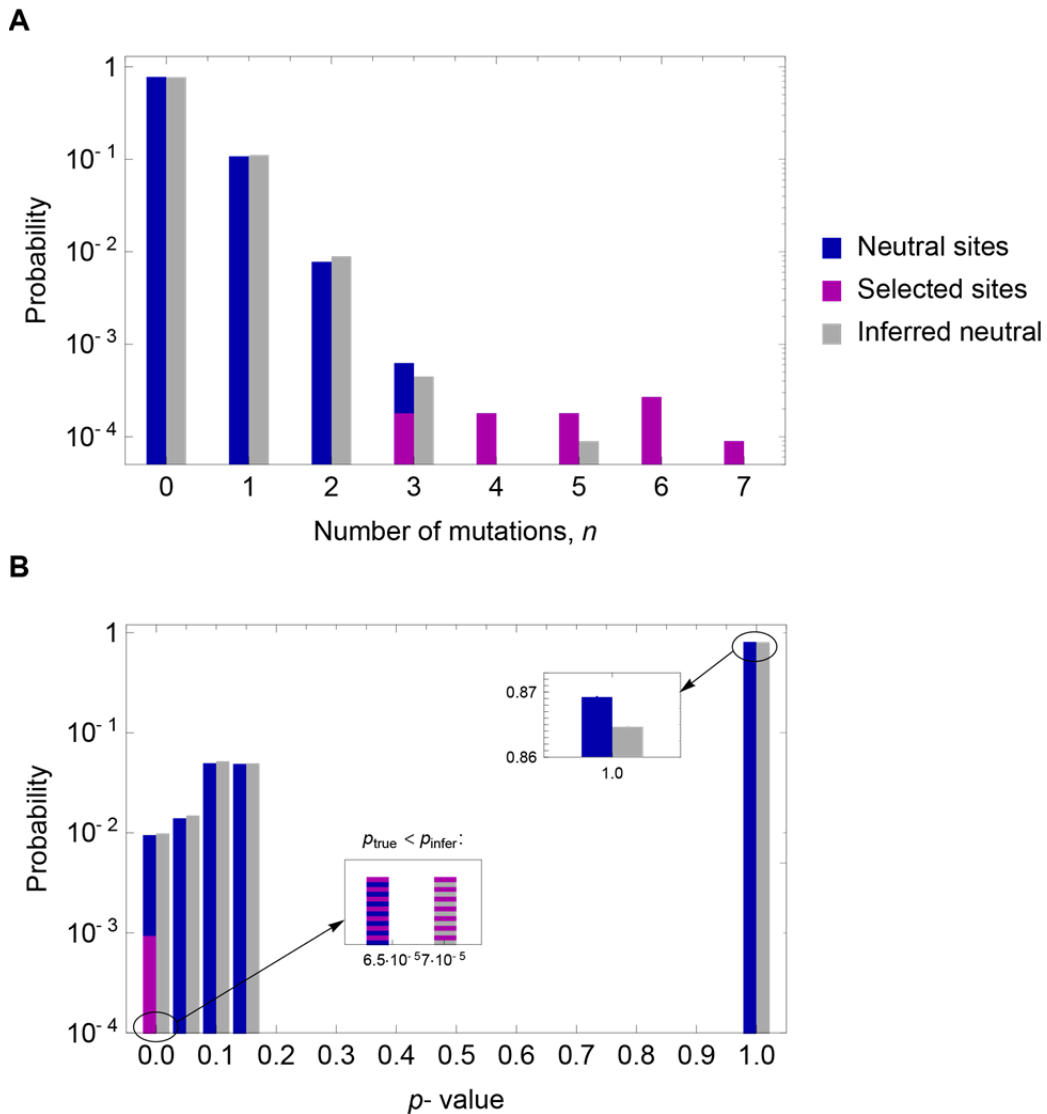

74

75 **Supplementary Figure 8: The presence of driver DHSs in a cluster leads to overestimation of the inferred mutation**

76 **probability and a conservative test statistic  $p$ .** (A) Shown is a simulated distribution of mutation counts  $n$ , each drawn

77 from a Poisson distribution with varying parameter  $\lambda = \mu L$ . 0.1% of all sites were simulated at a higher mutation

78 probability  $\mu_s$  than that of neutral sites,  $\mu$ . The resulting distribution  $P(n)$  is shown in magenta/blue. Inference of  $\mu$

79 according to Eq. 2 in the presence of selected sites leads to an overestimation of the true neutral mutation probability in

80 the cluster. The resulting inferred neutral distribution is given in gray. (B) Histogram of  $p$  (Eq. 3) corresponding to the

81 counts in (A), based on the inferred neutral mutation probability  $\hat{\mu}$  (bin width 0.05). The observed distribution  $P(n)$  of

82 neutral and selected counts in (A) has a higher variance, leading to an excess at small  $p$  as well as for  $p = 1$  relative to the

83 expected distribution (top right inset). Importantly, values  $p$  of selected sites are overestimated with  $\hat{\mu}$  and hence

84 conservative. This can be seen in the lower inset, showing the true and inferred average values  $\bar{p}_\mu$  (magenta/blue bar) and

85  $\bar{p}_{\hat{\mu}}$  (magenta/gray bar), respectively, for sites under selection. This figure shows that the presence of mutations in driver

86 DHSs creates a bias in the inference of the mutation probability. This bias results in the overestimation of  $\hat{\mu}$ , therefore the

87 calculation of  $p$  for Filter 1 is conservative.

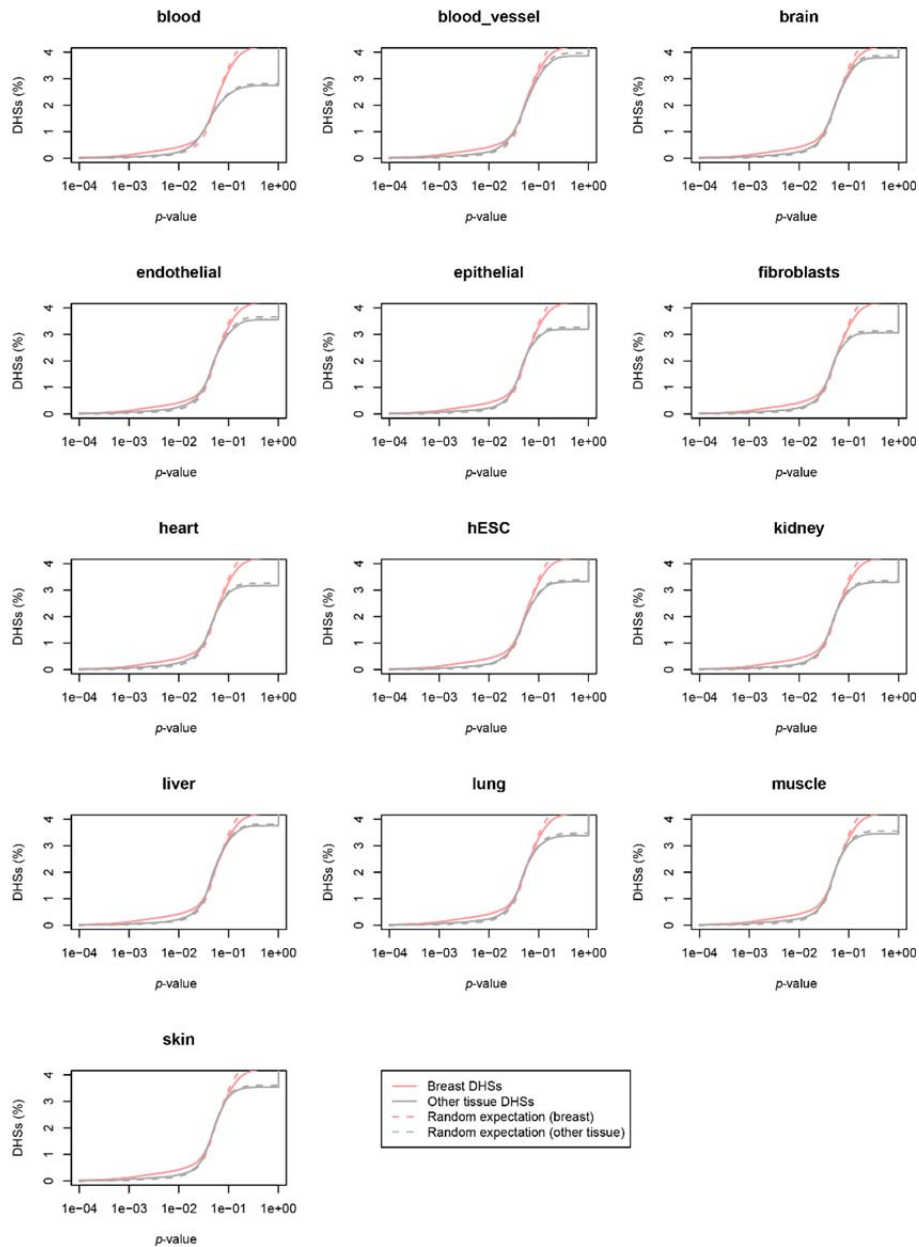

88

89

**Supplementary Figure 9: Comparison of distributions of test statistic  $p$  for observed and simulated DHS**

90

**mutations.** Cumulative distributions of the test statistic  $p$  for: 1) breast DHSs; 2) DHSs that are active in control tissues;

91

3) simulated mutations (random expectation), corresponding to the model of neutral evolution, in breast DHSs; and 4)

92

simulated mutations (random expectation) in control tissues DHSs. These data show that for all control tissues DHSs, the

93

difference between the observed and simulated  $p$  distributions are smaller than what is observed for breast DHSs.

94

95

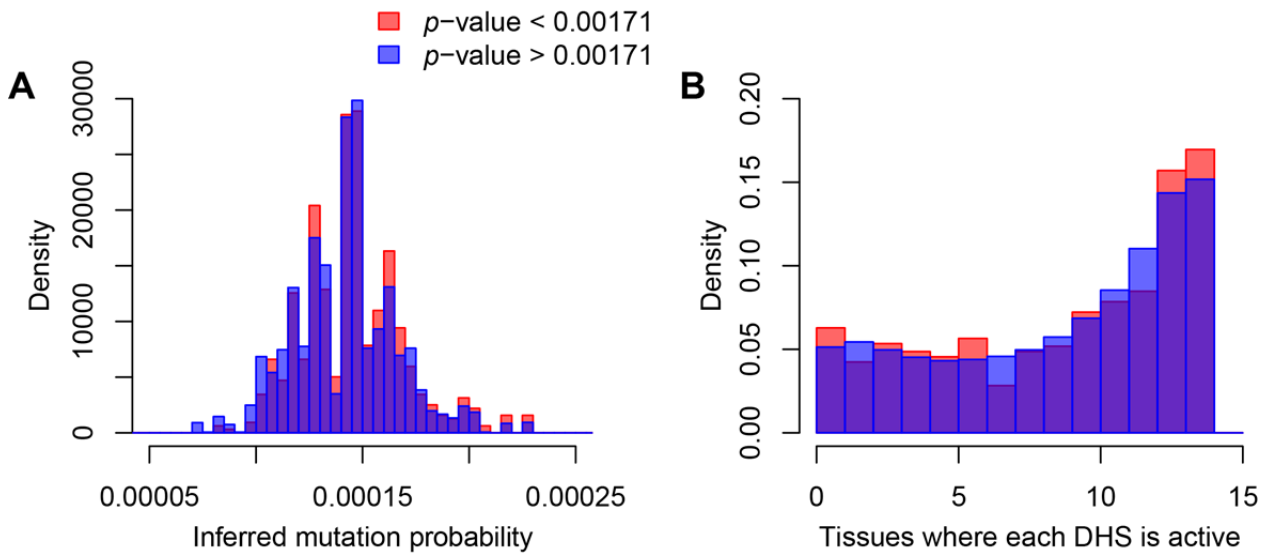

96  
 97 **Supplementary Figure 10: Clusters with significantly mutated breast DHSs and clusters without significantly**  
 98 **mutated breast DHSs do not differ in terms of inferred mutation rate and number of tissues in which a DHS is**  
 99 **active.** (A) Histogram of the inferred mutation probability  $\hat{\mu}$  (Eq. 2) from all 223 clusters of breast DHSs (blue) and of the  
 100 clusters from which the 637 significantly mutated DHSs with  $p < 0.00171$  originate (red). This shows that the  
 101 significantly mutated breast DHSs we use to determine driver loci form an ensemble that has no severe bias of the  
 102 background mutation probability. (B) Histogram of the number of tissues the full set of 334,781 breast DHSs are active in  
 103 (blue) and only for the significantly mutated DHSs (red). These plots show that the calculation of  $p$  for Filter 1 does not  
 104 introduce any bias in terms of inferred mutation rate  $\hat{\mu}$  and number of tissues in which a breast DHSs is active.



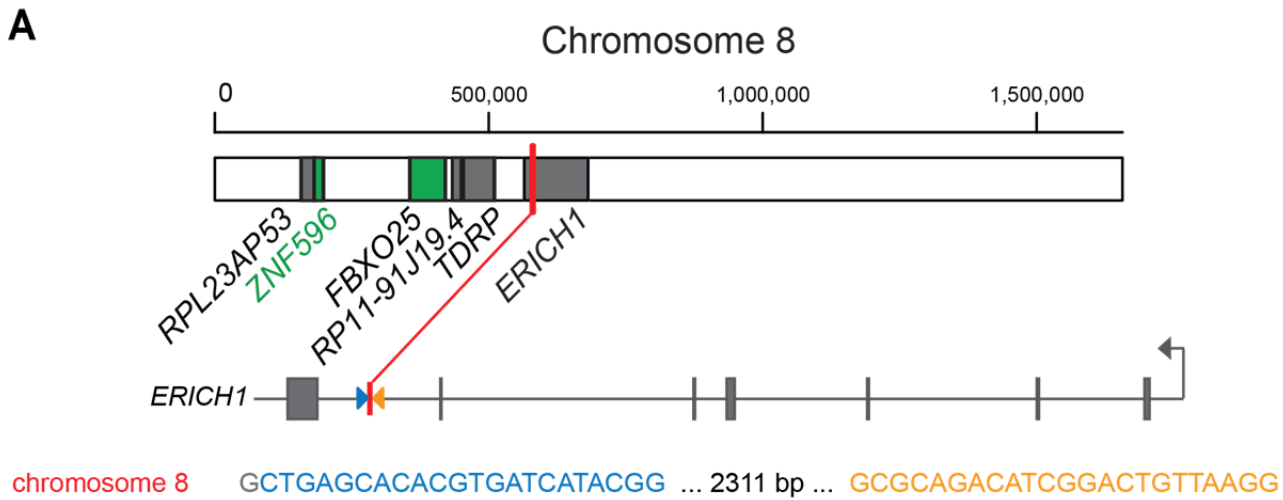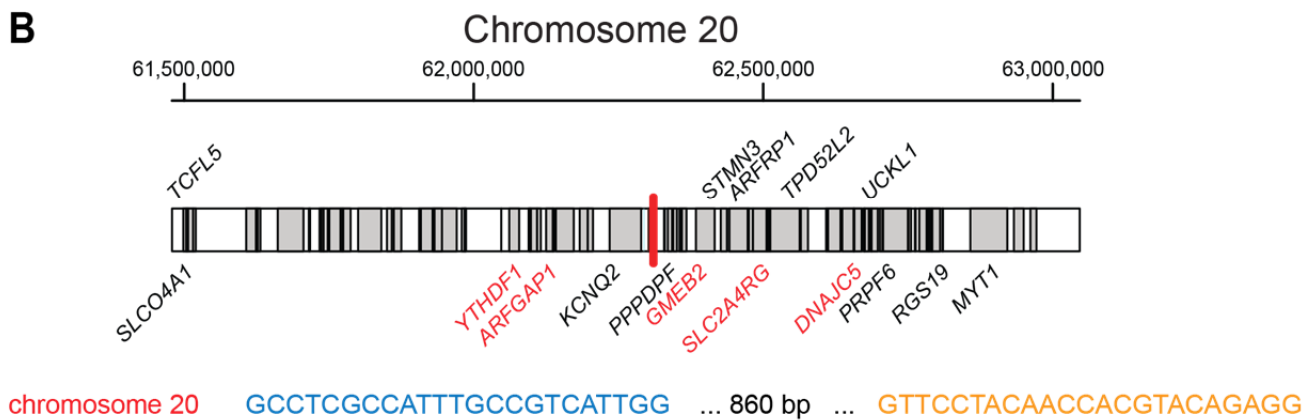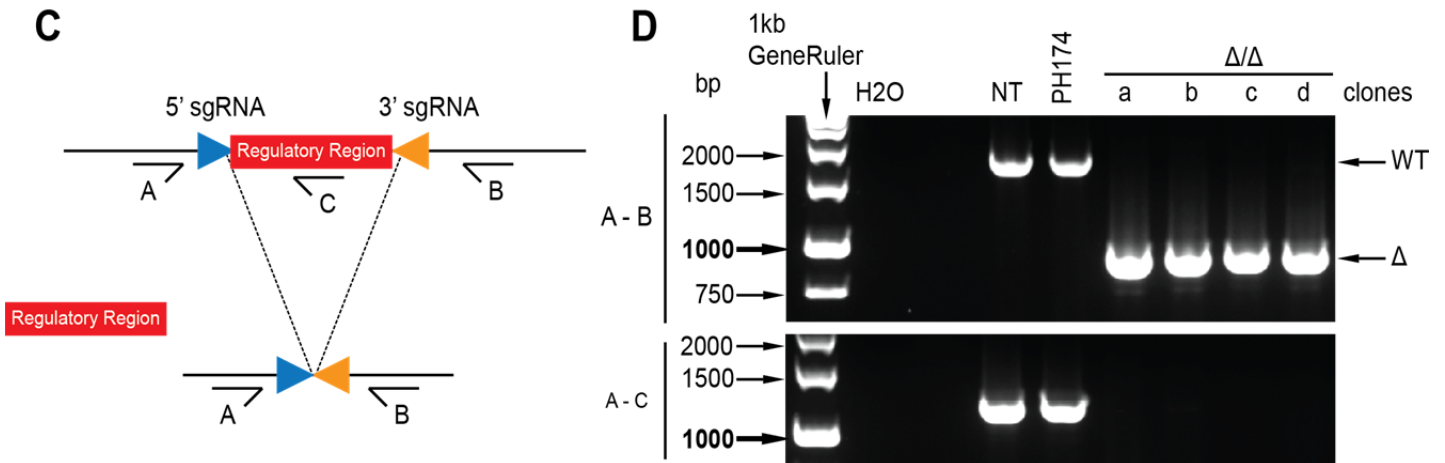

115  
 116 **Supplementary Figure 12: Experimental design for the deletion of putative driver DHSs chr8:579137-581436 and**  
 117 **chr20:62115827-62119284.** (A, B) Genomic intervals harboring the two putative driver DHSs that were targeted for  
 118 deletion by CRISPR are shown: chr8:579137-581436 and chr20:62115827-62119284. The deleted DHS interval is shown  
 119 in red. Target genes of the putative driver DHSs in TCGA breast tumors are shown in green (downregulated) or red  
 120 (overexpressed, Supplementary Data 5). Primers used by CRISPR are shown (forward in blue; reverse in orange). (C)

121 Schematic of PCR design to assess whether the DHS sequences are deleted. **(D)** Example PCR showing detection of  
122 homozygous deletions. The top panel shows PCR results using primers A and B for HEK293T cells with no treatment  
123 (NT), with empty vector (PH174), and four deleted clones. The bottom panel is with primers **A** and **C** showing that the  
124 PCR amplicon is only amplified in lines for which the putative driver DHS has not been deleted. The putative driver DHS  
125 chr8:579137-581436 is located within an *ERICH1* intron it is greater than 30 kb from splice sites, therefore its deletion  
126 and that would not be expected to impact the correct splicing of *ERICH1* and we verified that this is indeed the case by  
127 examining the RNA-seq data.

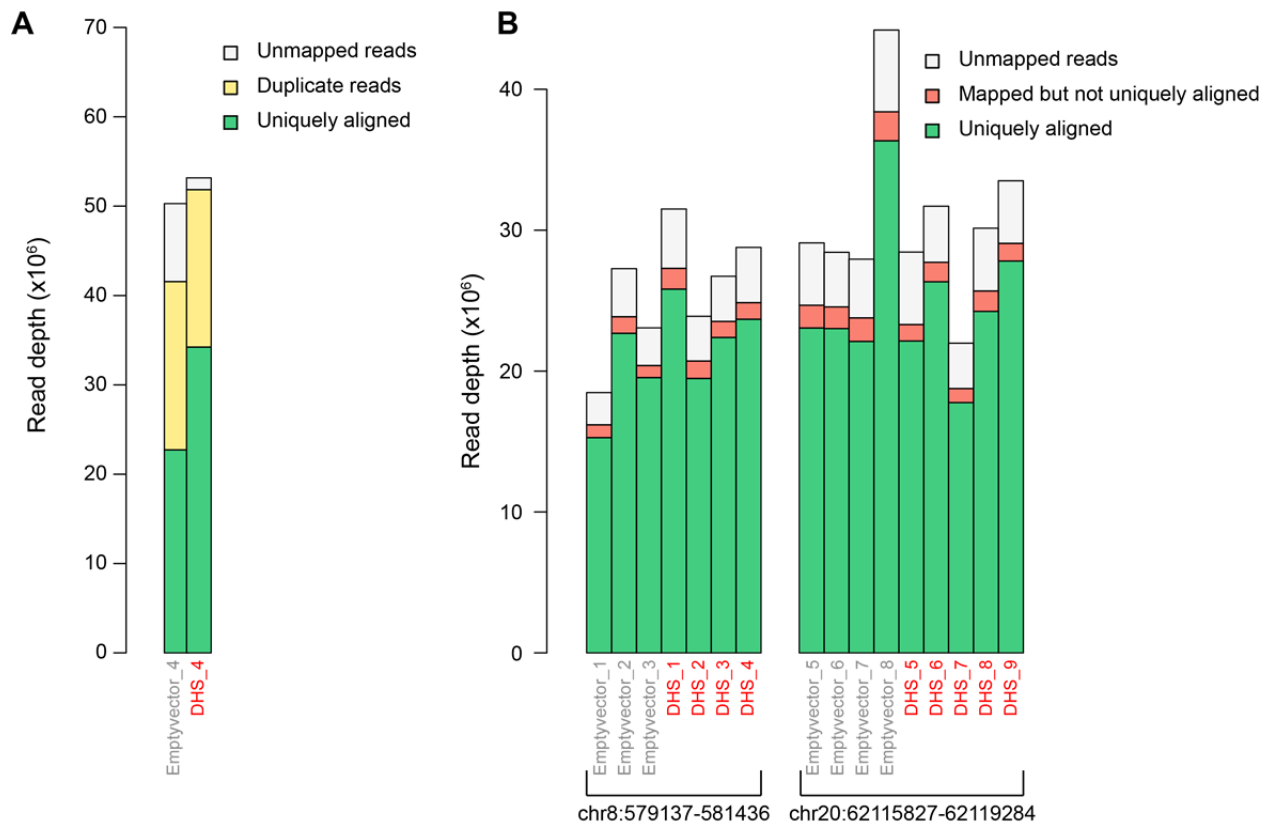

129

130

131

132

133

134

135

136

137

**Supplementary Figure 13: Mapping results of ATAC-seq and RNA-seq experiments.** Shown are the distributions of sequence reads for (A) the two ATAC-seq samples and (B) the 16 RNA-seq samples (nine for the analysis of the putative driver DHS on chromosome 20 and seven for the putative driver DHS on chromosome 8). Only uniquely aligned reads (in green) were used to determine chromatin remodeling and differential gene expression. Overall, read depth in all sequenced samples was high (>15 million reads). For the analysis of chr8:579137-581436, three technical replicates for empty vector and four with deleted DHS were used. For chr20:62115827-62119284, four technical replicates with empty vector and five with deleted DHS were used.



| TCGA ID      | Use         | Gender | Age at Initial Diagnosis | ER Status | PR Status | HER2 Status | Stage | Clinically relevant phenotype | Subtype       |
|--------------|-------------|--------|--------------------------|-----------|-----------|-------------|-------|-------------------------------|---------------|
| TCGA-A1-A0SM | Discovery   | MALE   | 77                       | Positive  | Negative  | Positive    | IIA   | HR+/HER2+                     | Luminal B     |
| TCGA-A2-A04P | Discovery   | FEMALE | 36                       | Negative  | Negative  | Negative    | IIIC  | Triple negative               | Basal-like    |
| TCGA-A2-A04Q | Discovery   | FEMALE | 48                       | Negative  | Negative  | Negative    | IA    | Triple negative               | Basal-like    |
| TCGA-A2-A04T | Discovery   | FEMALE | 62                       | Negative  | Negative  | Negative    | IIA   | Triple negative               | Basal-like    |
| TCGA-A2-A04X | Discovery   | FEMALE | 34                       | Positive  | Positive  | Positive    | IIA   | HR+/HER2+                     | Luminal B     |
| TCGA-A2-A0CM | Discovery   | FEMALE | 40                       | Negative  | Negative  | Negative    | IIA   | Triple negative               | Basal-like    |
| TCGA-A2-A0D0 | Discovery   | FEMALE | 60                       | Negative  | Negative  | Negative    | IIA   | Triple negative               | Basal-like    |
| TCGA-A2-A0D1 | Discovery   | FEMALE | 76                       | Negative  | Negative  | Positive    | IIA   | HR-/HER2+                     | HER2-enriched |
| TCGA-A2-A0D2 | Discovery   | FEMALE | 45                       | Negative  | Negative  | Negative    | IIB   | Triple negative               | Basal-like    |
| TCGA-A2-A0D4 | Replication | FEMALE | 37                       | Positive  | Positive  | Negative    | IIB   | HR+/HER2-                     | Luminal A     |
| TCGA-A2-A0EY | Discovery   | FEMALE | 62                       | Positive  | Negative  | Positive    | IIB   | HR+/HER2+                     | Luminal B     |
| TCGA-A2-A0YG | Discovery   | FEMALE | 63                       | Positive  | Positive  | Positive    | IIIC  | HR+/HER2+                     | Luminal B     |
| TCGA-A2-A259 | Replication | FEMALE | 70                       | Positive  | Positive  | Negative    | IA    | HR+/HER2-                     | Luminal A     |
| TCGA-A2-A25B | Replication | FEMALE | 39                       | Positive  | Positive  | Negative    | IIB   | HR+/HER2-                     | Luminal A     |
| TCGA-A2-A3XX | Replication | FEMALE | 49                       | Negative  | Negative  | Negative    | IIA   | Triple negative               | Basal-like    |
| TCGA-A2-A3Y0 | Replication | FEMALE | 57                       | Positive  | Negative  | Negative    | IIB   | HR+/HER2-                     | Luminal A     |
| TCGA-A7-A0CE | Discovery   | FEMALE | 57                       | Negative  | Negative  | Negative    | IIA   | Triple negative               | Basal-like    |
| TCGA-A7-A13D | Replication | FEMALE | 46                       | Negative  | Positive  | Negative    | IIA   | HR+/HER2-                     | Luminal B     |
| TCGA-A7-A26G | Replication | FEMALE | 50                       | Negative  | Negative  | Negative    | IIA   | Triple negative               | Basal-like    |
| TCGA-A8-A075 | Replication | FEMALE | 42                       | Positive  | Positive  | Negative    | IIB   | HR+/HER2-                     | Luminal A     |
| TCGA-A8-A07B | Discovery   | FEMALE | 69                       | Positive  | Positive  | Positive    | IIA   | HR+/HER2+                     | Luminal B     |
| TCGA-A8-A07I | Discovery   | FEMALE | 69                       | Positive  | Negative  | Positive    | IIIA  | HR+/HER2+                     | Luminal B     |
| TCGA-A8-A08B | Replication | FEMALE | 52                       | Positive  | Negative  | Positive    | IIA   | HR+/HER2+                     | Luminal B     |
| TCGA-A8-A08L | Discovery   | FEMALE | 89                       | Positive  | Negative  | Negative    | IIIA  | HR+/HER2-                     | Luminal A     |
| TCGA-A8-A08S | Discovery   | FEMALE | 71                       | Positive  | Positive  | Positive    | IIA   | HR+/HER2+                     | Luminal B     |
| TCGA-A8-A092 | Discovery   | FEMALE | 48                       | Positive  | Positive  | Negative    | IIIA  | HR+/HER2-                     | Luminal A     |
| TCGA-A8-A094 | Discovery   | FEMALE | 75                       | Positive  | Negative  | Negative    | IIA   | HR+/HER2-                     | Luminal A     |
| TCGA-A8-A09I | Discovery   | FEMALE | 84                       | Positive  | Positive  | Positive    | IIA   | HR+/HER2+                     | Luminal B     |
| TCGA-A8-A09X | Discovery   | FEMALE | 62                       | Negative  | Negative  | Negative    | IIIC  | Triple negative               | Basal-like    |
| TCGA-AC-A2BK | Replication | FEMALE | 78                       | Negative  | Negative  | Negative    | IIIA  | Triple negative               | Basal-like    |
| TCGA-AN-A04D | Replication | FEMALE | 58                       | Negative  | Negative  | Negative    | IIB   | Triple negative               | Basal-like    |
| TCGA-AN-A0AT | Replication | FEMALE | 62                       | Negative  | Negative  | Negative    | IIA   | Triple negative               | Basal-like    |
| TCGA-AN-A0G0 | Replication | FEMALE | 56                       | Negative  | Negative  | Negative    | IIA   | Triple negative               | Basal-like    |
| TCGA-AN-A0XR | Replication | FEMALE | 55                       | Positive  | Negative  | Negative    | IIIA  | HR+/HER2-                     | Luminal A     |
| TCGA-AO-A03L | Discovery   | FEMALE | 34                       | Positive  | Positive  | Negative    | IIIA  | HR+/HER2-                     | Luminal A     |
| TCGA-AO-A03N | Discovery   | FEMALE | 59                       | Positive  | Positive  | Negative    | IIB   | HR+/HER2-                     | Luminal A     |

|              |             |        |    |          |          |          |      |                 |               |
|--------------|-------------|--------|----|----------|----------|----------|------|-----------------|---------------|
| TCGA-AO-A0J2 | Discovery   | FEMALE | 41 | Negative | Negative | Negative | IA   | Triple negative | Basal-like    |
| TCGA-AO-A0J4 | Discovery   | FEMALE | 41 | Negative | Negative | Negative | IA   | Triple negative | Basal-like    |
| TCGA-AO-A0J6 | Discovery   | FEMALE | 61 | Negative | Negative | Negative | IIA  | Triple negative | Basal-like    |
| TCGA-AO-A0JM | Replication | FEMALE | 40 | Positive | Positive | Positive | IIB  | HR+/HER2+       | Luminal B     |
| TCGA-AO-A124 | Replication | FEMALE | 38 | Negative | Negative | Negative | IIA  | Triple negative | Basal-like    |
| TCGA-AO-A12H | Replication | FEMALE | 69 | Positive | Positive | Negative | IIA  | HR+/HER2-       | Luminal A     |
| TCGA-AQ-A04J | Discovery   | FEMALE | 45 | Negative | Negative | Negative | IIA  | Triple negative | Basal-like    |
| TCGA-AR-A0TX | Discovery   | FEMALE | 64 | Positive | Positive | Positive | II   | HR+/HER2+       | Luminal B     |
| TCGA-AR-A1AY | Replication | FEMALE | 65 | Negative | Negative | Negative | I    | Triple negative | Basal-like    |
| TCGA-AR-A24Z | Replication | FEMALE | 57 | Positive | Positive | Negative | II   | HR+/HER2-       | Luminal A     |
| TCGA-AR-A256 | Replication | FEMALE | 45 | Negative | Negative | Negative | II   | Triple negative | Basal-like    |
| TCGA-AR-A2LK | Replication | FEMALE | 62 | Positive | Positive | NA       | III  | Unknown         | NA            |
| TCGA-B6-A011 | Replication | FEMALE | 93 | Negative | Negative | NA       | IIA  | Unknown         | NA            |
| TCGA-B6-A012 | Discovery   | FEMALE | 45 | NA       | NA       | Negative | IA   | Triple negative | Basal-like    |
| TCGA-B6-A016 | Discovery   | FEMALE | 49 | Negative | Negative | NA       | IIA  | Triple negative | Basal-like    |
| TCGA-B6-A01J | Discovery   | FEMALE | 42 | Positive | Positive | Negative | IIB  | HR+/HER2-       | Basal-like    |
| TCGA-B6-A0IQ | Discovery   | FEMALE | 40 | Negative | Negative | Negative | IIIA | Triple negative | Basal-like    |
| TCGA-B6-A0RE | Discovery   | FEMALE | 61 | Negative | Negative | Negative | NA   | Triple negative | Basal-like    |
| TCGA-B6-A0RT | Discovery   | FEMALE | 39 | Negative | Negative | Negative | IIIA | Triple negative | Basal-like    |
| TCGA-B6-A0RU | Discovery   | FEMALE | 49 | Negative | Negative | Negative | IA   | Triple negative | Basal-like    |
| TCGA-B6-A0WX | Replication | FEMALE | 40 | Negative | Negative | Negative | IIIA | Triple negative | Basal-like    |
| TCGA-BH-A0AV | Replication | FEMALE | 52 | Negative | Negative | Negative | I    | Triple negative | Basal-like    |
| TCGA-BH-A0B3 | Discovery   | FEMALE | 53 | Negative | Negative | Negative | IIB  | Triple negative | Basal-like    |
| TCGA-BH-A0B9 | Discovery   | FEMALE | 44 | Negative | Negative | Negative | IA   | Triple negative | Basal-like    |
| TCGA-BH-A0BW | Replication | FEMALE | 71 | Negative | Negative | Negative | I    | Triple negative | Basal-like    |
| TCGA-BH-A0DG | Replication | FEMALE | 30 | Positive | Negative | Negative | IIA  | HR+/HER2-       | Luminal A     |
| TCGA-BH-A0DT | Replication | FEMALE | 41 | Positive | Positive | Negative | IIA  | HR+/HER2-       | Luminal A     |
| TCGA-BH-A0E0 | Discovery   | FEMALE | 38 | Negative | Negative | Negative | IIIC | Triple negative | Basal-like    |
| TCGA-BH-A0EA | Replication | FEMALE | 72 | Positive | Positive | Negative | IIA  | HR+/HER2-       | Luminal A     |
| TCGA-BH-A0H0 | Replication | FEMALE | 69 | Positive | Positive | Negative | IA   | HR+/HER2-       | Luminal B     |
| TCGA-BH-A0H6 | Replication | FEMALE | 82 | Positive | Positive | Negative | IA   | HR+/HER2-       | Luminal A     |
| TCGA-BH-A0WA | Discovery   | FEMALE | 82 | Negative | Negative | Negative | IA   | Triple negative | Basal-like    |
| TCGA-BH-A18R | Discovery   | FEMALE | 50 | Positive | Negative | Positive | IB   | HR+/HER2+       | Luminal B     |
| TCGA-BH-A18U | Discovery   | FEMALE | 72 | Positive | Positive | Positive | IIIA | HR+/HER2+       | Luminal B     |
| TCGA-BH-A1FC | Replication | FEMALE | 78 | Negative | Negative | Negative | IIA  | Triple negative | Basal-like    |
| TCGA-C8-A12L | Discovery   | FEMALE | 67 | Negative | Negative | Positive | IIA  | HR-/HER2+       | HER2-enriched |
| TCGA-C8-A12Q | Discovery   | FEMALE | 78 | Negative | Negative | Positive | IIIA | HR-/HER2+       | HER2-enriched |

|              |             |        |    |          |          |          |      |                 |               |
|--------------|-------------|--------|----|----------|----------|----------|------|-----------------|---------------|
| TCGA-C8-A130 | Discovery   | FEMALE | 52 | Positive | Positive | Positive | IIIA | HR+/HER2+       | Luminal B     |
| TCGA-D8-A27F | Replication | FEMALE | 40 | Negative | Negative | Negative | IIA  | Triple negative | Basal-like    |
| TCGA-D8-A27H | Replication | FEMALE | 72 | Negative | Negative | Negative | IIA  | Triple negative | Basal-like    |
| TCGA-E2-A109 | Replication | FEMALE | 64 | Positive | Negative | Negative | IIA  | HR+/HER2-       | Luminal A     |
| TCGA-E2-A14P | Discovery   | FEMALE | 79 | Negative | Negative | Positive | IIIC | HR-/HER2+       | HER2-enriched |
| TCGA-E2-A14X | Replication | FEMALE | 55 | Negative | Negative | Negative | IIIA | Triple negative | Basal-like    |
| TCGA-E2-A152 | Discovery   | FEMALE | 56 | Positive | Negative | Positive | I    | HR+/HER2+       | Luminal B     |
| TCGA-E2-A156 | Replication | FEMALE | 61 | Positive | Positive | Negative | I    | HR+/HER2-       | Luminal A     |
| TCGA-E2-A15E | Discovery   | FEMALE | 40 | Positive | Positive | Positive | IIA  | HR+/HER2+       | Luminal B     |
| TCGA-E2-A15H | Discovery   | FEMALE | 38 | Positive | Positive | Positive | IIA  | HR+/HER2+       | Luminal B     |
| TCGA-E2-A15K | Replication | FEMALE | 58 | Positive | Positive | Negative | IIA  | HR+/HER2-       | Luminal B     |
| TCGA-E2-A1LG | Replication | FEMALE | 50 | Negative | Negative | Negative | IIA  | Triple negative | Basal-like    |
| TCGA-E2-A1LK | Replication | FEMALE | 84 | Negative | Negative | Negative | IIIC | Triple negative | Basal-like    |
| TCGA-E2-A1LL | Replication | FEMALE | 73 | Negative | Negative | Negative | IIIA | Triple negative | Basal-like    |
| TCGA-E9-A1NH | Replication | FEMALE | 71 | Positive | Positive | Negative | IIB  | HR+/HER2-       | Luminal A     |
| TCGA-EW-A1J5 | Replication | FEMALE | 59 | Positive | Positive | Negative | IIB  | HR+/HER2-       | Luminal A     |
| TCGA-EW-A1P8 | Replication | FEMALE | 58 | Negative | Negative | Negative | IIIC | Triple negative | Basal-like    |
| TCGA-EW-A1PB | Replication | FEMALE | 70 | Negative | Negative | Negative | IIIA | Triple negative | Basal-like    |
| TCGA-EW-A1PC | Replication | FEMALE | 66 | Positive | Positive | Positive | IIB  | HR+/HER2+       | Luminal B     |
| TCGA-EW-A1PH | Replication | FEMALE | 52 | Negative | Negative | Negative | IIA  | Triple negative | Basal-like    |
| TCGA-EW-A3U0 | Replication | FEMALE | 61 | Negative | Negative | Negative | IIIA | Triple negative | Basal-like    |
| TCGA-GI-A2C9 | Replication | FEMALE | 59 | Negative | Negative | Negative | IIB  | Triple negative | Basal-like    |
| TCGA-GM-A2DF | Replication | FEMALE | 53 | Negative | Negative | Negative | NA   | Triple negative | Basal-like    |
| TCGA-GM-A3XL | Replication | FEMALE | 49 | Negative | Negative | NA       | IIA  | Unknown         | NA            |

140

141 Breast cancer samples in TCGA with WGS were divided into two groups: “discovery” and “replication”. Data shown in  
142 the table shows clinical information including subtypes derived from the TCGA breast cancer paper<sup>3</sup>.

143

**Supplementary Table 2: Number of somatic mutations in the 47 discovery samples**

| Barcode      | Mutations | Outside repeats | Not in dbSNP | Outside repeats and Not in dbSNP | Mutations in all coding regions | Mutations in 12 driver genes |
|--------------|-----------|-----------------|--------------|----------------------------------|---------------------------------|------------------------------|
| TCGA-A1-A0SM | 3,241     | 1,229           | 2,447        | 1,043                            | 25                              |                              |
| TCGA-A2-A04P | 11,651    | 5,333           | 10,677       | 5,070                            | 91                              | <i>PIK3CA, TP53</i>          |
| TCGA-A2-A04Q | 4,424     | 1,466           | 3,129        | 1,221                            | 10                              |                              |
| TCGA-A2-A04T | 9,025     | 4,057           | 8,143        | 3,834                            | 75                              | <i>PIK3CA, TP53</i>          |
| TCGA-A2-A04X | 5,982     | 2,294           | 4,666        | 2,014                            | 22                              |                              |
| TCGA-A2-A0CM | 12,098    | 4,081           | 9,815        | 3,608                            | 47                              | <i>TP53</i>                  |
| TCGA-A2-A0D0 | 9,643     | 4,262           | 8,640        | 3,961                            | 53                              | <i>TP53</i>                  |
| TCGA-A2-A0D1 | 6,082     | 2,450           | 4,927        | 2,170                            | 56                              | <i>PIK3CA, TP53</i>          |
| TCGA-A2-A0D2 | 9,297     | 4,111           | 8,235        | 3,876                            | 67                              |                              |
| TCGA-A2-A0EY | 23,262    | 10,533          | 21,532       | 10,040                           | 149                             | <i>PIK3CA, TP53</i>          |
| TCGA-A2-A0YG | 6,767     | 2,754           | 5,642        | 2,462                            | 38                              | <i>TP53</i>                  |
| TCGA-A7-A0CE | 10,067    | 4,587           | 9,087        | 4,300                            | 102                             | <i>TP53</i>                  |
| TCGA-A8-A07B | 8,257     | 3,388           | 6,996        | 3,094                            | 52                              | <i>PIK3CA, CDH1</i>          |
| TCGA-A8-A07I | 6,656     | 2,659           | 5,385        | 2,333                            | 32                              |                              |
| TCGA-A8-A08L | 24,664    | 11,618          | 23,278       | 11,213                           | 162                             | <i>PIK3CA</i>                |
| TCGA-A8-A08S | 5,327     | 2,157           | 4,292        | 1,902                            | 41                              |                              |
| TCGA-A8-A092 | 9,509     | 3,930           | 8,371        | 3,624                            | 74                              | <i>PIK3CA, TP53</i>          |
| TCGA-A8-A094 | 41,714    | 19,184          | 38,654       | 18,324                           | 139                             | <i>TP53</i>                  |
| TCGA-A8-A09I | 16,195    | 7,079           | 14,146       | 6,551                            | 101                             |                              |
| TCGA-A8-A09X | 6,543     | 2,791           | 5,586        | 2,507                            | 47                              | <i>TP53, CDH1</i>            |
| TCGA-AO-A03L | 4,523     | 1,647           | 3,420        | 1,422                            | 23                              | <i>PIK3CA, TP53</i>          |
| TCGA-AO-A03N | 11,169    | 4,892           | 9,884        | 4,557                            | 76                              | <i>PIK3CA, TP53</i>          |
| TCGA-AO-A0J2 | 10,023    | 4,402           | 8,907        | 4,116                            | 52                              | <i>TP53</i>                  |
| TCGA-AO-A0J4 | 9,483     | 4,064           | 8,370        | 3,794                            | 74                              |                              |
| TCGA-AO-A0J6 | 11,326    | 5,002           | 10,114       | 4,703                            | 91                              | <i>TP53</i>                  |
| TCGA-AQ-A04J | 8,608     | 3,253           | 7,151        | 2,883                            | 41                              | <i>TP53</i>                  |
| TCGA-AR-A0TX | 32,160    | 15,110          | 30,516       | 14,608                           | 225                             | <i>TP53, MLL3</i>            |
| TCGA-B6-A0I2 | 5,866     | 2,264           | 4,778        | 2,003                            | 42                              |                              |
| TCGA-B6-A0I6 | 13,510    | 4,950           | 11,737       | 4,560                            | 84                              |                              |
| TCGA-B6-A0IJ | 15,266    | 6,567           | 13,541       | 6,145                            | 115                             | <i>TP53, MLL3</i>            |
| TCGA-B6-A0IQ | 8,422     | 3,299           | 7,161        | 2,998                            | 49                              | <i>TP53</i>                  |
| TCGA-B6-A0RE | 13,517    | 6,172           | 12,432       | 5,860                            | 82                              | <i>TP53</i>                  |
| TCGA-B6-A0RT | 5,050     | 1,500           | 3,729        | 1,290                            | 12                              |                              |
| TCGA-B6-A0RU |           |                 |              |                                  |                                 | <i>TP53</i>                  |

|                    |         |         |         |         |       |                     |
|--------------------|---------|---------|---------|---------|-------|---------------------|
|                    | 6,150   | 2,445   | 5,051   | 2,158   | 37    |                     |
| TCGA-BH-A0B3       | 4,371   | 1,663   | 3,653   | 1,473   | 33    | <i>TP53</i>         |
| TCGA-BH-A0B9       | 4,947   | 1,801   | 3,887   | 1,583   | 31    | <i>TP53</i>         |
| TCGA-BH-A0E0       | 5,025   | 2,049   | 4,219   | 1,875   | 27    | <i>TP53</i>         |
| TCGA-BH-A0WA       | 9,035   | 4,072   | 8,199   | 3,833   | 74    | <i>TP53</i>         |
| TCGA-BH-A18R       | 5,505   | 2,115   | 4,344   | 1,868   | 19    |                     |
| TCGA-BH-A18U       | 12,113  | 5,423   | 10,834  | 5,068   | 66    | <i>TP53</i>         |
| TCGA-C8-A12L       | 8,992   | 3,839   | 7,572   | 3,465   | 60    | <i>PIK3CA, TP53</i> |
| TCGA-C8-A12Q       | 13,376  | 6,062   | 12,018  | 5,738   | 75    | <i>TP53</i>         |
| TCGA-C8-A130       | 5,691   | 2,172   | 4,590   | 1,941   | 28    | <i>PIK3CA, TP53</i> |
| TCGA-E2-A14P       | 10,049  | 4,173   | 8,743   | 3,872   | 58    | <i>TP53</i>         |
| TCGA-E2-A152       | 15,756  | 6,970   | 14,254  | 6,535   | 97    | <i>TP53</i>         |
| TCGA-E2-A15E       | 4,792   | 1,561   | 3,634   | 1,334   | 34    | <i>PIK3CA, TP53</i> |
| TCGA-E2-A15H       | 3,656   | 1,334   | 2,678   | 1,129   | 28    | <i>GATA3</i>        |
| Total              | 488,785 | 208,764 | 429,064 | 193,958 | 3,016 |                     |
| Mean               | 10,400  | 4,442   | 9,129   | 4,127   | 64    |                     |
| Standard deviation | 7,343   | 3,510   | 7,042   | 3,409   | 42    |                     |

For each discovery sample, the total number of mutations, the number retained after filtering those in repeat elements and the number retained after filtering those in same loci as known SNPs is given. Mutations in coding regions were obtained by intersecting the coordinates of mutations “outside repeats and not overlapping SNPs” with the coordinates of exons in RefSeq. Tumors carrying mutations in the 12 most mutated genes in breast cancer (*TP53*, *PIK3CA*, *MAP3K1*, *MAP2K4*, *GATA3*, *MLL3*, *CDH1*, *PTEN*, *PIK3R1*, *RUNX1*, *TBX3*, *CTCF*)<sup>3</sup> are indicated.

| Barcode      | Chromosome | Start       | End         | Length | Mutations |
|--------------|------------|-------------|-------------|--------|-----------|
| TCGA-A2-A04T | 20         | 23,032,942  | 23,034,704  | 1,762  | 8         |
| TCGA-A2-A0D1 | 7          | 21,851,455  | 21,851,755  | 300    | 6         |
| TCGA-A2-A0D1 | 8          | 37,659,335  | 37,659,860  | 525    | 6         |
| TCGA-A2-A0D1 | 8          | 37,700,295  | 37,700,919  | 624    | 10        |
| TCGA-A2-A0D1 | 8          | 58,443,184  | 58,444,071  | 887    | 8         |
| TCGA-A2-A0D1 | 8          | 72,928,240  | 72,931,013  | 2,773  | 6         |
| TCGA-A2-A0EY | 1          | 16,259,369  | 16,263,369  | 4,000  | 9         |
| TCGA-A2-A0EY | 3          | 112,944,536 | 112,945,519 | 983    | 6         |
| TCGA-A2-A0EY | 4          | 169,678,393 | 169,682,344 | 3,951  | 6         |
| TCGA-A2-A0EY | 6          | 44,400,208  | 44,407,911  | 7,703  | 9         |
| TCGA-A2-A0EY | 9          | 127,213,358 | 127,217,554 | 4,196  | 7         |
| TCGA-A2-A0EY | 12         | 9,252,514   | 9,255,974   | 3,460  | 13        |
| TCGA-A2-A0EY | 12         | 9,262,140   | 9,266,681   | 4,541  | 7         |
| TCGA-A2-A0EY | 12         | 33,903,108  | 33,903,588  | 480    | 6         |
| TCGA-A2-A0EY | 14         | 51,730,888  | 51,731,888  | 1,000  | 7         |
| TCGA-A2-A0EY | 22         | 38,506,441  | 38,512,084  | 5,643  | 6         |
| TCGA-A2-A0YG | 1          | 156,012,150 | 156,013,281 | 1,131  | 7         |
| TCGA-A2-A0YG | 17         | 37,135,494  | 37,136,758  | 1,264  | 10        |
| TCGA-A2-A0YG | 17         | 68,236,999  | 68,241,345  | 4,346  | 10        |
| TCGA-A8-A07B | 6          | 104,702,242 | 104,705,888 | 3,646  | 18        |
| TCGA-A8-A07B | 10         | 11,557,279  | 11,558,269  | 990    | 6         |
| TCGA-A8-A07B | 17         | 38,588,845  | 38,592,720  | 3,875  | 7         |
| TCGA-A8-A07B | 17         | 47,991,548  | 47,993,890  | 2,342  | 9         |
| TCGA-A8-A07I | 1          | 206,691,371 | 206,691,962 | 591    | 7         |
| TCGA-A8-A07I | 5          | 176,920,569 | 176,921,077 | 508    | 6         |
| TCGA-A8-A07I | 17         | 35,348,085  | 35,348,723  | 638    | 7         |
| TCGA-A8-A08L | 10         | 552,529     | 556,915     | 4,386  | 8         |
| TCGA-A8-A08S | 17         | 11,545,905  | 11,546,728  | 823    | 6         |
| TCGA-A8-A092 | 6          | 79,100,755  | 79,105,982  | 5,227  | 7         |
| TCGA-A8-A094 | 11         | 70,227,346  | 70,228,031  | 685    | 6         |
| TCGA-A8-A094 | 11         | 72,021,990  | 72,025,477  | 3,487  | 8         |
| TCGA-A8-A094 | 14         | 64,494,033  | 64,497,798  | 3,765  | 7         |
| TCGA-A8-A094 | 14         | 64,496,933  | 64,502,142  | 5,209  | 6         |
| TCGA-A8-A09I | 4          | 179,916,674 | 179,920,696 | 4,022  | 7         |
| TCGA-A8-A09I | 17         | 47,575,829  | 47,576,908  | 1,079  | 6         |
| TCGA-A8-A09I | 17         | 50,083,291  | 50,088,314  | 5,023  | 8         |
| TCGA-A8-A09X | 17         | 62,602,674  | 62,605,074  | 2,400  | 6         |
| TCGA-AO-A03L | 17         | 36,045,536  | 36,046,632  | 1,096  | 6         |
| TCGA-AO-A03L | 17         | 62,022,649  | 62,023,238  | 589    | 7         |
| TCGA-AO-A03N | 6          | 24,866,014  | 24,870,295  | 4,281  | 8         |
| TCGA-AO-A03N | 14         | 39,365,583  | 39,371,162  | 5,579  | 8         |
| TCGA-AO-A0J4 | 4          | 41,207,566  | 41,211,336  | 3,770  | 8         |
| TCGA-AO-A0J6 | 4          | 60,430,427  | 60,436,313  | 5,886  | 6         |
| TCGA-AR-A0TX | 3          | 404,828     | 406,798     | 1,970  | 9         |
| TCGA-AR-A0TX | 5          | 141,129,047 | 141,133,447 | 4,400  | 7         |
| TCGA-AR-A0TX | 12         | 71,950,715  | 71,952,574  | 1,859  | 18        |
| TCGA-AR-A0TX | 22         | 45,290,464  | 45,292,151  | 1,687  | 6         |
| TCGA-AR-A0TX | 22         | 45,327,933  | 45,333,222  | 5,289  | 12        |
| TCGA-B6-A0I2 | 11         | 12,021,427  | 12,029,713  | 8,286  | 15        |

|              |    |             |             |       |    |
|--------------|----|-------------|-------------|-------|----|
| TCGA-B6-A0I2 | 11 | 20,470,068  | 20,474,307  | 4,239 | 15 |
| TCGA-B6-A0I2 | 19 | 58,034,134  | 58,035,287  | 1,153 | 6  |
| TCGA-B6-A0I2 | 19 | 58,050,928  | 58,052,938  | 2,010 | 8  |
| TCGA-B6-A0IJ | 5  | 158,509,045 | 158,515,725 | 6,680 | 21 |
| TCGA-B6-A0IJ | 5  | 159,334,934 | 159,341,701 | 6,767 | 19 |
| TCGA-B6-A0IJ | 8  | 75,835,306  | 75,838,460  | 3,154 | 10 |
| TCGA-B6-A0IQ | X  | 92,476,864  | 92,480,247  | 3,383 | 13 |
| TCGA-BH-A0E0 | 11 | 93,274,832  | 93,280,476  | 5,644 | 10 |
| TCGA-BH-A0WA | 3  | 127,114,492 | 127,115,577 | 1,085 | 10 |
| TCGA-BH-A0WA | 5  | 85,485,660  | 85,486,578  | 918   | 6  |
| TCGA-BH-A18U | 7  | 52,435,879  | 52,436,584  | 705   | 7  |
| TCGA-C8-A12L | 1  | 94,528,520  | 94,533,145  | 4,625 | 15 |
| TCGA-C8-A12Q | 11 | 51,481,124  | 51,486,972  | 5,848 | 11 |
| TCGA-C8-A12Q | 22 | 38,009,864  | 38,013,218  | 3,354 | 6  |
| TCGA-C8-A130 | 12 | 93,113,082  | 93,116,188  | 3,106 | 6  |
| TCGA-C8-A130 | 13 | 22,848,441  | 22,849,810  | 1,369 | 6  |
| TCGA-C8-A130 | 13 | 40,238,558  | 40,241,564  | 3,006 | 10 |
| TCGA-E2-A14P | 10 | 12,678,941  | 12,680,251  | 1,310 | 8  |
| TCGA-E2-A152 | 17 | 36,513,811  | 36,514,825  | 1,014 | 9  |
| TCGA-E2-A15E | 8  | 30,282,266  | 30,286,142  | 3,876 | 10 |

152 We show the coordinates and number of mutations in each of the 69 kataegis loci found in 29 TCGA discovery samples.  
153 Kataegis loci are defined as stretches of at least 6 consecutive mutations with intermutation distances < 1000 bp.

| <b>Cell line</b>   | <b>Tissue type</b> |
|--------------------|--------------------|
| Cd4naivewb11970640 | Blood              |
| Gm06990            | Blood              |
| Gm12865            | Blood              |
| K562               | Blood              |
| K562Znfa41c6       | Blood              |
| K562Znfp5          | Blood              |
| Monocd14ro1746     | Blood              |
| Nb4                | Blood              |
| Th1                | Blood              |
| Th17               | Blood              |
| Th1wb33676984      | Blood              |
| Th2                | Blood              |
| Th2wb54553204      | Blood              |
| Tregwb78495824     | Blood              |
| Hpaf               | Blood vessel       |
| Huvec              | Blood vessel       |
| Hah                | Brain              |
| Hasp               | Brain              |
| M059j              | Brain              |
| Nha                | Brain              |
| Sknshra            | Brain              |
| Hmvecb             | Endothelial        |
| Hmvecd             | Endothelial        |
| Hmvecblad          | Endothelial        |
| Hmvecf             | Endothelial        |
| Hmvech             | Endothelial        |
| Hcpe               | Epithelial         |
| Hee                | Epithelial         |
| Hipe               | Epithelial         |
| Hpdf               | Epithelial         |
| Saec               | Epithelial         |
| Aoaf               | Fibroblasts        |
| Hgf                | Fibroblasts        |
| Hvmf               | Fibroblasts        |
| Hcf                | Heart              |
| Hcfaa              | Heart              |
| Hcm                | Heart              |
| H7es               | hESC               |
| Hrce               | Kidney             |
| Hepg2              | Liver              |
| A549               | Lung               |
| Cd20ro01778        | Lung               |
| Hpf                | Lung               |
| Nhlf               | Lung               |
| Hsmm               | Muscle             |
| Lhcnm2             | Muscle             |
| Lhcnm2Diff4d       | Muscle             |
| Skmc               | Muscle             |
| Ag10803            | Skin               |



|          |      |
|----------|------|
| Hff      | Skin |
| Nhdfad   | Skin |
| Nhdfneo  | Skin |
| Rpmi7951 | Skin |

155 For each of the 53 ENCODE cell lines with DHS data used in this study we show the associated control tissue.

156 **Supplementary Table 5:** Negative controls

| Tissue type         | DHSs (N)  | DHSs that do not overlap breast DHSs (N) | DHSs not overlapping kataegis or repetitive elements | Mutated DHSs (N) | Clusters | KS test | P-value for FDR = 0.25 |
|---------------------|-----------|------------------------------------------|------------------------------------------------------|------------------|----------|---------|------------------------|
| Breast              | 392,977   | NA                                       | 334,781                                              | 14,087           | 223      | 0.005   | 0.001710               |
| Blood               | 1,137,583 | 884,950                                  | 676,840                                              | 18,653           | 311      | 0.920   | 0.000220               |
| Blood vessel        | 275,756   | 95,832                                   | 81,642                                               | 3,150            | 124      | 1.000   | 0.000360               |
| Brain               | 470,284   | 234,714                                  | 197,273                                              | 7,490            | 172      | 1.000   | 0.000240               |
| Endothelial         | 280,845   | 121,281                                  | 104,059                                              | 3,700            | 146      | 1.000   | 0.000390               |
| Epithelial          | 491,790   | 234,839                                  | 192,507                                              | 6,150            | 240      | 1.000   | 0.000290               |
| Fibroblasts         | 398,166   | 177,028                                  | 147,637                                              | 4,522            | 216      | 1.000   | 0.000430               |
| Heart               | 309,438   | 101,189                                  | 84,276                                               | 2,679            | 151      | 1.000   | 0.000440               |
| hESC                | 450,533   | 280,868                                  | 212,139                                              | 7,046            | 164      | 1.000   | 0.000260               |
| Kidney              | 277,700   | 106,669                                  | 91,378                                               | 3,016            | 122      | 1.000   | 0.000470               |
| Liver               | 156,560   | 78,584                                   | 70,482                                               | 2,656            | 116      | 1.000   | 0.000150               |
| Lung                | 476,844   | 232,494                                  | 192,804                                              | 6,523            | 193      | 1.000   | 0.000260               |
| Muscle              | 443,342   | 205,343                                  | 168,441                                              | 5,823            | 171      | 1.000   | 0.000470               |
| Skin                | 405,710   | 169,184                                  | 141,990                                              | 5,020            | 199      | 1.000   | 0.000280               |
| All control tissues | NA        | 1,363,604                                | 1,064,296                                            | 38,882           | 356      | 0.870   | 0.000328               |

157 For each of the 13 control tissues we show the number of DHSs, the number of DHSs retained after removing those that  
158 overlap breast DHSs, the number of DHSs retained after removing those that overlap kataegis loci and repetitive elements,  
159 the total number of mutated DHSs, and the number of clusters. The last row “All control tissues” represents the union of  
160 all DHSs in the 13 control tissues. “KS test” represents the p-value from Kolmogorov-Smirnov test to assess the  
161 probability with which the observed values of the test statistic  $p$  in control tissues stem from the expected distribution  
162 simulated under the neutral Poisson model.

163

**Supplementary Table 6:** Number of somatic mutations in the 50 TCGA replication samples

| Barcode      | Mutations | Outside repeats | Not in dbSNP | Outside repeats and Not in dbSNP |
|--------------|-----------|-----------------|--------------|----------------------------------|
| TCGA-A2-A0D4 | 6,149     | 2,268           | 5,046        | 2,007                            |
| TCGA-A2-A259 | 3,951     | 1,314           | 2,691        | 1,047                            |
| TCGA-A2-A25B | 13,283    | 5,625           | 11,747       | 5,242                            |
| TCGA-A2-A3XX | 5,476     | 1,943           | 4,240        | 1,687                            |
| TCGA-A2-A3Y0 | 15,936    | 7,053           | 14,461       | 6,657                            |
| TCGA-A7-A13D | 10,821    | 4,556           | 9,464        | 4,204                            |
| TCGA-A7-A26G | 7,708     | 2,907           | 6,323        | 2,598                            |
| TCGA-A8-A075 | 9,637     | 4,154           | 8,459        | 3,905                            |
| TCGA-A8-A08B | 6,146     | 2,239           | 4,922        | 1,963                            |
| TCGA-AC-A2BK | 11,473    | 4,851           | 10,162       | 4,494                            |
| TCGA-AN-A04D | 9,789     | 4,129           | 8,481        | 3,857                            |
| TCGA-AN-A0AT | 9,975     | 4,273           | 8,887        | 4,021                            |
| TCGA-AN-A0G0 | 5,959     | 2,235           | 4,592        | 1,960                            |
| TCGA-AN-A0XR | 5,153     | 1,893           | 3,895        | 1,628                            |
| TCGA-AO-A0JM | 5,548     | 2,005           | 4,365        | 1,778                            |
| TCGA-AO-A124 | 17,191    | 7,890           | 15,822       | 7,494                            |
| TCGA-AO-A12H | 4,749     | 1,523           | 3,450        | 1,234                            |
| TCGA-AR-A1AY | 6,755     | 2,616           | 5,400        | 2,295                            |
| TCGA-AR-A24Z | 6,583     | 2,478           | 5,192        | 2,141                            |
| TCGA-AR-A256 | 19,993    | 9,103           | 18,465       | 8,645                            |
| TCGA-AR-A2LK | 5,246     | 2,024           | 4,122        | 1,737                            |
| TCGA-B6-A0I1 | 8,138     | 3,179           | 6,752        | 2,854                            |
| TCGA-B6-A0WX | 5,406     | 1,954           | 4,199        | 1,665                            |
| TCGA-BH-A0AV | 9,292     | 3,944           | 7,960        | 3,652                            |
| TCGA-BH-A0BW | 11,001    | 4,420           | 9,527        | 4,066                            |
| TCGA-BH-A0DG | 4,859     | 1,730           | 3,710        | 1,483                            |
| TCGA-BH-A0DT | 3,140     | 939             | 2,001        | 703                              |
| TCGA-BH-A0EA | 4,055     | 1,330           | 2,921        | 1,095                            |
| TCGA-BH-A0H0 | 4,314     | 1,504           | 3,252        | 1,262                            |
| TCGA-BH-A0H6 | 4,256     | 1,464           | 3,070        | 1,215                            |
| TCGA-BH-A1FC | 12,007    | 5,250           | 10,604       | 4,872                            |
| TCGA-D8-A27F | 10,159    | 4,242           | 8,940        | 3,980                            |
| TCGA-D8-A27H | 13,412    | 6,069           | 12,040       | 5,714                            |
| TCGA-E2-A109 |           |                 |              |                                  |

|                    |         |         |         |         |
|--------------------|---------|---------|---------|---------|
|                    | 10,939  | 4,571   | 9,586   | 4,215   |
| TCGA-E2-A14X       | 5,194   | 1,892   | 4,050   | 1,642   |
| TCGA-E2-A156       | 4,033   | 1,376   | 2,852   | 1,141   |
| TCGA-E2-A15K       | 12,518  | 5,263   | 11,031  | 4,889   |
| TCGA-E2-A1LG       | 16,200  | 7,317   | 14,893  | 6,969   |
| TCGA-E2-A1LK       | 6,447   | 2,317   | 5,188   | 1,995   |
| TCGA-E2-A1LL       | 10,990  | 4,840   | 9,728   | 4,551   |
| TCGA-E9-A1NH       | 4,551   | 1,652   | 3,422   | 1,425   |
| TCGA-EW-A1J5       | 45,235  | 21,536  | 43,263  | 20,895  |
| TCGA-EW-A1P8       | 5,052   | 1,699   | 3,731   | 1,430   |
| TCGA-EW-A1PB       | 17,210  | 7,848   | 15,840  | 7,504   |
| TCGA-EW-A1PC       | 22,800  | 10,450  | 21,247  | 9,982   |
| TCGA-EW-A1PH       | 7,997   | 3,291   | 6,587   | 2,914   |
| TCGA-EW-A3U0       | 19,036  | 8,374   | 17,467  | 7,959   |
| TCGA-GI-A2C9       | 16,053  | 7,072   | 14,662  | 6,693   |
| TCGA-GM-A2DF       | 5,049   | 1,768   | 3,720   | 1,500   |
| TCGA-GM-A3XL       | 10,877  | 4,760   | 9,592   | 4,472   |
| Total              | 497,741 | 209,130 | 432,021 | 193,331 |
| Mean               | 9,955   | 4,183   | 8,640   | 3,867   |
| Standard deviation | 7,024   | 3,439   | 6,892   | 3,370   |

165

166 The number of mutations is shown for each of the 50 TCGA replication samples. Similarly to the TCGA discovery  
167 samples (Supplementary Table 2), mutations within repeat elements and in the same loci of known SNPs were filtered out  
168 in order to lower the false-positive rate.

169

170

| DHS                      | Gene            | Expression    | Role in cancer                                                                      |
|--------------------------|-----------------|---------------|-------------------------------------------------------------------------------------|
| chr15:78292337-78292883  | <i>ACSBG1</i>   | Downregulated | Aberrantly expressed in breast cancer <sup>8</sup>                                  |
| chr1:21660551-21662029   | <i>ALPL</i>     | Downregulated |                                                                                     |
| chr20:62115827-62119284  | <i>ARFGAP1</i>  | Overexpressed | Involved in microsatellite instability oncogenesis <sup>9</sup>                     |
| chr1:928510-931954       | <i>ATAD3B</i>   | Overexpressed | Associated with breast cancer progression and prognosis <sup>10</sup>               |
| chr1:928510-931954       | <i>C1orf159</i> | Overexpressed |                                                                                     |
| chr5:1325957-1328153     | <i>CLPTM1L</i>  | Overexpressed | Associated with breast cancer risk <sup>11-14</sup> ; 20 kb upstream of <i>TERT</i> |
| chr20:62115827-62119284  | <i>COL20A1</i>  | Overexpressed | Used in expression microarray breast cancer risk predictive model <sup>15</sup>     |
| chr20:62115827-62119284  | <i>DNAJC5</i>   | Overexpressed |                                                                                     |
| chr1:928510-931954       | <i>DVL1</i>     | Overexpressed | Aberrantly expressed in testicular cancer <sup>16</sup>                             |
| chr1:21660551-21662029   | <i>ECE1</i>     | Downregulated | Involved in prostate cancer cell invasion <sup>17</sup>                             |
| chr2:216531968-216533440 | <i>FN1</i>      | Overexpressed | Associated with several cancer types <sup>18,19</sup>                               |
| chr20:62115827-62119284  | <i>GMEB2</i>    | Overexpressed |                                                                                     |
| chr1:185903622-185904645 | <i>HMCN1</i>    | Downregulated | Mutated in gastric and colorectal cancer <sup>20</sup>                              |
| chr15:78292337-78292883  | <i>IREB2</i>    | Downregulated | Involved in lung cancer <sup>21</sup>                                               |
| chr1:928510-931954       | <i>ISG15</i>    | Overexpressed | Inhibits cancer cell growth and promotes apoptosis <sup>22</sup>                    |
| chr5:1325957-1328153     | <i>LPCAT1</i>   | Overexpressed | Upregulation in breast cancer is associated with tumor progression <sup>23</sup>    |
| chr1:46476793-46477209   | <i>MAST2</i>    | Overexpressed | Translocation partner of <i>NOTCH1</i> in breast cancer <sup>24</sup>               |
| chr1:928510-931954       | <i>MXRA8</i>    | Downregulated |                                                                                     |
| chr20:62115827-62119284  | <i>NKAIN4</i>   | Downregulated |                                                                                     |
| chr1:46476793-46477209   | <i>RAD54L</i>   | Overexpressed | Associated with breast cancer progression and prognosis <sup>25</sup>               |
| chr20:62115827-62119284  | <i>SLC2A4RG</i> | Overexpressed |                                                                                     |
| chr1:928510-931954       | <i>TNFRSF4</i>  | Overexpressed | Involved in head and neck squamous cell carcinoma <sup>26</sup>                     |
| chr6:28948439-28951450   | <i>TRIM27</i>   | Overexpressed | Known oncogene included in the Cancer Gene Census <sup>27</sup>                     |
| chr1:928510-931954       | <i>TLL10</i>    | Downregulated |                                                                                     |
| chr1:928510-931954       | <i>VWA1</i>     | Overexpressed | Aberrantly methylated in ovarian cancer <sup>28</sup>                               |
| chr20:62115827-62119284  | <i>YTHDF1</i>   | Overexpressed |                                                                                     |
| chr8:579137-581436       | <i>ZNF596</i>   | Downregulated | Downregulated in breast cancer <sup>29</sup> and osteosarcoma <sup>30</sup>         |

172 For each of the 27 genes that are aberrantly expressed when the ten putative driver DHSs are mutated, their expression  
173 and role in cancer are shown.

174

175

**Supplementary Table 8:** Clusters analysis of the mutation rate in the ten driver DHSs by comparison to 20 random DHSs with similar genomic properties in all cancer types

| DHS                      |                     |             | 20 random DHSs with similar properties |                     |             | Tests         |                   |          |                      |
|--------------------------|---------------------|-------------|----------------------------------------|---------------------|-------------|---------------|-------------------|----------|----------------------|
| DHS                      | Number of mutations | Length (bp) | Mutation rate                          | Number of mutations | Length (bp) | Mutation rate | Log2 (odds ratio) | P-value  | FDR < 0.05 threshold |
| chr1:185903622-185904645 | 0                   | 846         | 0.0000                                 | 14                  | 16019       | 0.0009        | -10.00            | 1.00E+00 | 1.30E-02             |
| chr1:21660551-21662029   | 11                  | 929         | 0.0118                                 | 39                  | 6513        | 0.0060        | 0.98              | 2.71E-02 | 1.30E-02             |
| chr1:46476793-46477209   | 3                   | 400         | 0.0075                                 | 38                  | 5306        | 0.0072        | 0.07              | 5.46E-01 | 1.30E-02             |
| chr1:928510-931954       | 21                  | 1721        | 0.0122                                 | 227                 | 27883       | 0.0081        | 0.58              | 4.82E-02 | 1.30E-02             |
| chr15:78292337-78292883  | 0                   | 534         | 0.0000                                 | 3                   | 3913        | 0.0008        | -10.00            | 1.00E+00 | 1.30E-02             |
| chr16:28081546-28081590  | 0                   | 38          | 0.0000                                 | 0                   | 4552        | 0.0000        | 0.00              | N/A      | 1.30E-02             |
| chr19:14191744-14193178  | 10                  | 1028        | 0.0097                                 | 74                  | 10395       | 0.0071        | 0.45              | 2.03E-01 | 1.30E-02             |
| chr2:216531968-216533440 | 9                   | 1389        | 0.0065                                 | 49                  | 6950        | 0.0071        | -0.12             | 6.43E-01 | 1.30E-02             |
| chr2:218332114-218332448 | 2                   | 283         | 0.0071                                 | 49                  | 6950        | 0.0071        | 0.00              | 5.93E-01 | 1.30E-02             |
| chr20:62115827-62119284  | 60                  | 2679        | 0.0224                                 | 145                 | 15400       | 0.0094        | 1.25              | 2.90E-09 | 1.30E-02             |
| chr22:45987462-45987772  | 2                   | 291         | 0.0069                                 | 46                  | 6828        | 0.0067        | 0.03              | 5.83E-01 | 1.30E-02             |
| chr3:196189710-196189944 | 0                   | 222         | 0.0000                                 | 3                   | 3656        | 0.0008        | -10.00            | 1.00E+00 | 1.30E-02             |
| chr5:102609590-102610013 | 0                   | 404         | 0.0000                                 | 22                  | 3803        | 0.0058        | -10.00            | 1.00E+00 | 1.30E-02             |
| chr5:1325957-1328153     | 73                  | 2147        | 0.0340                                 | 272                 | 36059       | 0.0075        | 2.17              | 4.44E-16 | 1.30E-02             |
| chr6:28948439-28951450   | 16                  | 1959        | 0.0082                                 | 32                  | 5152        | 0.0062        | 0.40              | 1.68E-01 | 1.30E-02             |
| chr8:579137-581436       | 105                 | 2145        | 0.0490                                 | 44                  | 4334        | 0.0102        | 2.27              | 5.55E-16 | 1.30E-02             |

From the clusters defined in Supplementary Data 4, for each of the ten driver DHSs 20 random DHSs with similar genomic properties (GC content, gene density in the surrounding 500-kb region, open chromatin, DNA replication time and expected mutations based on trinucleotide composition) were selected and their mutations were detected in all cancer types (Figure 3B). Log2 odds ratio was calculated between the mutation rate in the DHS and the mutation rate in its associated 20 random DHSs. The test statistic  $p$  was calculated assuming the Poisson model described for the analysis of breast cancer, with  $\hat{\mu}$  for each driver DHS inferred from the set of 20 random DHSs. The significance threshold  $p^*$  was calculated as for Figure 2C (Eq. 4), requiring  $FDR < 0.05$  ( $p^* = 0.013$ ).

**Supplementary Table 9:** Description of the mutations validated in *C. intestinalis*

| Mutation         | Effect on TFBS                                                     | Mutated tumors                                              | Expression in reference allele                                 | Expression in alternative allele                                | Change between ref and alt                     |
|------------------|--------------------------------------------------------------------|-------------------------------------------------------------|----------------------------------------------------------------|-----------------------------------------------------------------|------------------------------------------------|
| chr6:28949254A>C | Increased affinity of GATA                                         | Multiple mutations in ovarian cancer (3 tumors)             | 25% a6.5 lineage, 68% Endoderm, 65% Secondary notochord        | 13% a6.5 lineage, 63% endoderm, 58% Secondary notochord         | Yes (50% decreased expression in a6.5 lineage) |
| chr6:28950040C>T | Potentially changed affinity of ETS (mutation 3 bp from GGAA core) | Breast cancer                                               | 25% a6.5 lineage, 68% Endoderm, 65% Secondary notochord        | 22% a6.5 lineage, 67% Endoderm, 68.5 Secondary notochord        | No                                             |
| chr6:28950050G>A | Potentially changed affinity of ETS (mutation 2 bp from GGAA core) | Mutations in three tumor types (stomach, bladder, melanoma) | 25% a6.5 lineage, 68% Endoderm, 65% Secondary notochord        | 17% a6.5 lineage, 54% Endoderm, 53% Secondary notochord         | Yes (>20% decrease in all three tissues)       |
| chr6:28950885A>G | Loss of GATA site                                                  | Bladder cancer                                              | 4% Epidermis, 84% b6.5 lineage, 83% a6.5 lineage, 43% Endoderm | 30% Epidermis, 87% b6.5 lineage, 84% a6.5 lineage, 52% Endoderm | Yes (7X increase expression in epidermis)      |

188

189 For each of the four mutations for which experimental validation was attempted, we show the position, the substitution  
190 type, the effects on transcription factor binding, the tumor types where each mutation was found, and a summary of the  
191 observed effects (tests are shown in Supplementary Table 10).

192

193 **Supplementary Table 10:** Effects of somatic mutations on *C. intestinalis* embryos

194 A) Replicates information

| Construct                   | chr6:28,948,460-28,950,283 |             |                  |             |                  |             |                  |             |
|-----------------------------|----------------------------|-------------|------------------|-------------|------------------|-------------|------------------|-------------|
| Mutation                    | Wild-type                  |             | chr6:28949254A>C |             | chr6:28950040C>T |             | chr6:28950050G>A |             |
| Lineage                     | Replicate 1                | Replicate 2 | Replicate 1      | Replicate 2 | Replicate 1      | Replicate 2 | Replicate 1      | Replicate 2 |
| <b>b6.5 lineage</b>         | NA                         | NA          | NA               | NA          | NA               | NA          | NA               | NA          |
| <b>a6.5 lineage</b>         | 22                         | 28          | 9                | 17          | 26               | 17          | 19               | 15          |
| <b>Endoderm</b>             | 60                         | 75          | 50               | 75          | 66               | 68          | 54               | 54          |
| <b>Epidermis</b>            | NA                         | NA          | NA               | NA          | NA               | NA          | NA               | NA          |
| <b>Secondary notochord</b>  | 61                         | 69          | 53               | 63          | 73               | 64          | 55               | 50          |
| <b>Total tested embryos</b> | 100                        | 100         | 100              | 100         | 100              | 100         | 100              | 100         |

195

| Construct                   | chr6:28,950,315-28,951,026 |             |             |                  |             |             |
|-----------------------------|----------------------------|-------------|-------------|------------------|-------------|-------------|
| Mutation                    | Wild-type                  |             |             | chr6:28950885A>G |             |             |
| Lineage                     | Replicate 1                | Replicate 2 | Replicate 3 | Replicate 1      | Replicate 2 | Replicate 3 |
| <b>b6.5 lineage</b>         | 39                         | 49          | 84          | 45               | 42          | 83          |
| <b>a6.5 lineage</b>         | 43                         | 50          | 78          | 45               | 37          | 82          |
| <b>Endoderm</b>             | 24                         | 33          | 32          | 20               | 22          | 59          |
| <b>Epidermis</b>            | 0                          | 0           | 9           | 16               | 17          | 26          |
| <b>Secondary notochord</b>  | NA                         | NA          | NA          | NA               | NA          | NA          |
| <b>Total tested embryos</b> | 50                         | 55          | 100         | 50               | 45          | 100         |

196

197 B) Tests to assess differences between wild-type and mutated enhancer

| Mutations        | Lineage             | Mutated   |               |             | Wild-type |               |             | P-value  |
|------------------|---------------------|-----------|---------------|-------------|-----------|---------------|-------------|----------|
|                  |                     | Expressed | Not expressed | % Expressed | Expressed | Not expressed | % Expressed |          |
| chr6:28950040C>T | a6.5 lineage        | 43        | 157           | 21.5        | 50        | 150           | 25.0        | 4.78E-01 |
| chr6:28950050G>A | a6.5 lineage        | 34        | 166           | 17.0        | 50        | 150           | 25.0        | 6.52E-02 |
| chr6:28949254A>C | a6.5 lineage        | 26        | 174           | 13.0        | 50        | 150           | 25.0        | 3.20E-03 |
| chr6:28950040C>T | Endoderm            | 134       | 66            | 67.0        | 135       | 65            | 67.5        | 1.00E+00 |
| chr6:28950050G>A | Endoderm            | 108       | 92            | 54.0        | 135       | 65            | 67.5        | 7.67E-03 |
| chr6:28949254A>C | Endoderm            | 125       | 75            | 62.5        | 135       | 65            | 67.5        | 3.45E-01 |
| chr6:28950040C>T | Secondary notochord | 137       | 63            | 68.5        | 130       | 70            | 65.0        | 5.24E-01 |

|                  |                     |     |     |      |     |     |      |          |
|------------------|---------------------|-----|-----|------|-----|-----|------|----------|
| chr6:28950050G>A | Secondary notochord | 105 | 95  | 52.5 | 130 | 70  | 65.0 | 1.47E-02 |
| chr6:28949254A>C | Secondary notochord | 116 | 84  | 58.0 | 130 | 70  | 65.0 | 1.82E-01 |
| chr6:28950885A>G | b6.5 lineage        | 170 | 25  | 87.2 | 172 | 33  | 83.9 | 3.95E-01 |
| chr6:28950885A>G | a6.5 lineage        | 164 | 31  | 84.1 | 171 | 34  | 83.4 | 8.93E-01 |
| chr6:28950885A>G | Endoderm            | 101 | 94  | 51.8 | 89  | 116 | 43.4 | 1.09E-01 |
| chr6:28950885A>G | Epidermis           | 59  | 136 | 30.3 | 9   | 196 | 4.4  | 1.25E-12 |

Shown are the lineages where GFP expression associated with each mutation was assessed. (A) Two or three replicates were conducted for each mutation test. For each replicate, the number of embryos that express the enhancer are shown. Two regions were tested with one wild type construct used per region. One of the two regions had three mutations examined. (B) The number of expressed and not expressed embryos, as well as the percentage of embryos showing GFP expression, is shown for the mutated and wild-type embryos combined across all replicates. P-values from Fisher's exact test are shown.

**Supplementary Table 11:** Primers used for experimental validation *in vivo*

| Location                   | Mutation         | Size (bp) | Fwd Primer                                          | Rev Primer                                   | Fwd Mutagenesis Primer                              | Rev Mutagenesis Primer                              |
|----------------------------|------------------|-----------|-----------------------------------------------------|----------------------------------------------|-----------------------------------------------------|-----------------------------------------------------|
| chr6:28,950,315-28,951,026 | chr6:28950885A>G | 712       | CATCATGG<br>CGCGCCTT<br>GGGTGATT<br>CAGTAAGC<br>GG  | CATCATTC<br>TAGATAAG<br>ATCAGGAG<br>CACCACGA | GTCTGACA<br>ATGTCGGG<br>GCATGAAT<br>CTTTGTTT<br>CTT | CATGCCCC<br>GACATTGT<br>CAGACAGG<br>AACCAGTT<br>AGC |
| chr6:28,948,460-28,950,283 | chr6:28949254A>C | 1,824     | CATCATGG<br>CGCGCCCG<br>AGTAGGAA<br>GACAGGGG<br>TTG | CATCATTC<br>TAGAAACA<br>ATGCCGGA<br>CACTCGGT | CTTTTCTT<br>CTGTTATC<br>TAGTGAGA<br>TGTTGAAA<br>CCC | CACTAGAT<br>AACAGAAG<br>AAAAGCAA<br>ACGTGCTG<br>AA  |
| chr6:28,948,460-28,950,283 | chr6:28950050G>A | 1,824     | CATCATGG<br>CGCGCCCG<br>AGTAGGAA<br>GACAGGGG<br>TTG | CATCATTC<br>TAGAAACA<br>ATGCCGGA<br>CACTCGGT | TCGATTCC<br>CGATCAGG<br>GAATGAGG<br>TTTTTCTG<br>TTT | CATTCCCT<br>GATCGGGA<br>ATCGAACC<br>CGGGCCCG<br>GGC |
| chr6:28,948,460-28,950,283 | chr6:28950040C>T | 1,824     | CATCATGG<br>CGCGCCCG<br>AGTAGGAA<br>GACAGGGG<br>TTG | CATCATTC<br>TAGAAACA<br>ATGCCGGA<br>CACTCGGT | GTCAGGGAA<br>TAAGGTTT<br>TTCTGTTT<br>TAACCTCC<br>AA | AGAAAAAC<br>CTTATTCC<br>CTGACCGG<br>GAATCGAA<br>CCC |

List of primers used for the *C. intestinalis* experiment.



208

209

210 **Supplementary Table 12:** sgRNAs used for CRISPR

| Name                      | Sequence 5' to 3'                              |
|---------------------------|------------------------------------------------|
| chr8:579138_T_5'_1 F      | <b>CACC</b> G CTG AGC ACA CGT GAT CAT A        |
| chr8:579138_T_5'_1 R      | <b>AAAC</b> T ATG ATC ACG TGT GCT CAG <b>C</b> |
| chr8:579138_T_3'_1 F      | <b>CACC</b> GCG CAG ACA TCG GAC TGT TA         |
| chr8:579138_T_3'_1 R      | <b>AAAC</b> TA ACA GTC CGA TGT CTG CGC         |
| chr20-62117780 - T-5'-1 F | <b>CACC</b> GCC TCG CCA TTT GCC GTC AT         |
| chr20-62117780 - T-5'-1 R | <b>AAAC</b> AT GAC GGC AAA TGG CGA GGC         |
| chr20-62117780 - T-3'-1 F | <b>CACC</b> GTT CCT ACA ACC ACG TAC AG         |
| chr20-62117780 - T-3'-1 R | <b>AAAC</b> CT GTA CGT GGT TGT AGG AAC         |

211 The table provides the sequences of the sgRNAs used to delete the putative driver DHSs with CRISPR. The sequences  
 212 highlighted in red were added to clone the sgRNAs into ph174 vectors.

213

214 **Supplementary Table 13:** PCR primers to confirm the deletion of putative driver DHS with CRISPR

| Name                 | Sequence 5' to 3'     |
|----------------------|-----------------------|
| chr8_579138_T_1 F    | CATAAAGACTAAAGGAGGTGG |
| chr8_579138_T_2 R    | GAGGAGAGACCGAAATTCTCA |
| chr8_579138_T_6 F    | CATGGCCTGAAGCTTGGCTC  |
| chr20_62117780_T_1 F | TCGTTTTCCGTCCTCACCTAG |
| chr20_62117780_T_2 F | CATCACCCTGCTGTCACCTG  |
| chr20_62117780_T_1R  | CACTCTCCTGCTAAGCCGGTC |
| chr20_62117780_T_3 R | GTTCCCTGAGGATGCAGGTG  |

215 List of primers used for PCRs to confirm the deletion of the putative driver DHSs and the control regions.

216

217 **Supplementary Table 14:** Metadata for the samples that underwent ATAC-seq and RNA-seq

| Sample ID     | Driver DHS tested       | Deleted interval        | Condition          | Clone ID      | Harvest date | Use                |
|---------------|-------------------------|-------------------------|--------------------|---------------|--------------|--------------------|
| emptyvector_1 | chr8:579137-581436      | NA                      | emptyvector        | chr8_PHI74_4  | 12/3/2014    | ATAC-seq + RNA-seq |
| emptyvector_2 | chr8:579137-581436      | NA                      | emptyvector        | chr8_PHI74_3  | 10/27/2014   | RNA-seq            |
| emptyvector_3 | chr8:579137-581436      | NA                      | emptyvector        | chr8_PHI74_2  | 10/1/2014    | RNA-seq            |
| dhs_1         | chr8:579137-581436      | chr8:579149-581504      | deleted driver DHS | chr8_T_43     | 10/23/2014   | RNA-seq            |
| dhs_2         | chr8:579137-581436      | chr8:579149-581504      | deleted driver DHS | chr8_T_44     | 10/23/2014   | RNA-seq            |
| dhs_3         | chr8:579137-581436      | chr8:579149-581504      | deleted driver DHS | chr8_T_51     | 12/5/2014    | RNA-seq            |
| dhs_4         | chr8:579137-581436      | chr8:579149-581504      | deleted driver DHS | chr8_T_58     | 12/5/2014    | ATAC-seq + RNA-seq |
| emptyvector_5 | chr20:62115827-62119284 | NA                      | emptyvector        | chr20_PHI74_1 | 11/22/2014   | RNA-seq            |
| emptyvector_6 | chr20:62115827-62119284 | NA                      | emptyvector        | chr20_PHI74_2 | 11/24/2014   | RNA-seq            |
| emptyvector_7 | chr20:62115827-62119284 | NA                      | emptyvector        | chr20_PHI74_3 | 11/26/2014   | RNA-seq            |
| emptyvector_8 | chr20:62115827-62119284 | NA                      | emptyvector        | chr20_PHI74_4 | 11/30/2014   | RNA-seq            |
| dhs_5         | chr20:62115827-62119284 | chr20:62117977-62118878 | deleted driver DHS | chr20_T_10    | 11/26/2014   | RNA-seq            |
| dhs_6         | chr20:62115827-62119284 | chr20:62117977-62118878 | deleted driver DHS | chr20_T_36    | 12/1/2014    | RNA-seq            |
| dhs_7         | chr20:62115827-62119284 | chr20:62117977-62118878 | deleted driver DHS | chr20_T_43    | 12/1/2014    | RNA-seq            |
| dhs_8         | chr20:62115827-62119284 | chr20:62117977-62118878 | deleted driver DHS | chr20_T_46    | 12/2/2014    | RNA-seq            |
| dhs_9         | chr20:62115827-62119284 | chr20:62117977-62118878 | deleted driver DHS | chr20_T_9     | 11/28/2014   | RNA-seq            |

218 Metadata for the samples that underwent ATAC-seq and RNA-seq. Samples with the same clone ID are technical  
 219 replicates. Harvest date refers to the date when samples were processed and pellets were frozen. All samples were  
 220 processed simultaneously for DNA and RNA extraction (ATAC-seq and RNA-seq), library generation and sequencing.

221

222 **Supplementary References**

223 1 Gradishar, W. J. *et al.* Breast cancer version 3.2014. *Journal of the National Comprehensive Cancer Network : JNCCN* **12**, 542-590 (2014).

224 2 Banerji, S. *et al.* Sequence analysis of mutations and translocations across breast cancer subtypes. *Nature* **486**, 405-409, doi:nature11154 (2012).

225 3 Network, T. C. G. A. R. Comprehensive molecular portraits of human breast tumours. *Nature* **490**, 61-70, doi:nature11412 (2012).

226 4 Stephens, P. J. *et al.* The landscape of cancer genes and mutational processes in breast cancer. *Nature* **486**, 400-404, doi:nature11017 (2012).

227 5 Tamborero, D. *et al.* Comprehensive identification of mutational cancer driver genes across 12 tumor types. *Scientific reports* **3**, 2650, doi:10.1038/srep02650 (2013).

228 6 Wilks, C. *et al.* The Cancer Genomics Hub (CGHub): overcoming cancer through the power of torrential data. *Database : the journal of biological databases and curation* **2014**, doi:10.1093/database/bau093 (2014).

229 7 Yost, S. E. *et al.* Mutoscope: sensitive detection of somatic mutations from deep amplicon sequencing. *Bioinformatics* **29**, 1908-1909, doi:10.1093/bioinformatics/btt305 (2013).

230 8 Makoukji, J. *et al.* Gene expression profiling of breast cancer in Lebanese women. *Scientific reports* **6**, 36639, doi:10.1038/srep36639 (2016).

231 9 Sangar, F. *et al.* Involvement of small ArfGAP1 (SMAP1), a novel Arf6-specific GTPase-activating protein, in microsatellite instability oncogenesis. *Oncogene* **33**, 2758-2767, doi:10.1038/onc.2013.211 (2014).

232 10 Ovaska, K. *et al.* Integrative analysis of deep sequencing data identifies estrogen receptor early response genes and links ATAD3B to poor survival in breast cancer. *PLoS computational biology* **9**, e1003100, doi:10.1371/journal.pcbi.1003100 (2013).

233 11 Liu, C. L. *et al.* Association between CLPTM1L-TERT rs401681 polymorphism and risk of pancreatic cancer: a meta-analysis. *Clinical and experimental medicine*, doi:10.1007/s10238-014-0316-3 (2014).

234 12 Yin, Z. *et al.* Genetic polymorphisms of TERT and CLPTM1L, cooking oil fume exposure, and risk of lung cancer: a case-control study in a Chinese non-smoking female population. *Medical oncology* **31**, 114, doi:10.1007/s12032-014-0114-5 (2014).

235 13 Zhang, Y. *et al.* Genetic polymorphisms of TERT and CLPTM1L and risk of lung cancer: a case-control study in northeast Chinese male population. *Medical oncology* **31**, 18, doi:10.1007/s12032-014-0018-4 (2014).

236 14 Zhao, D. P., Yang, C. L., Zhou, X., Ding, J. A. & Jiang, G. N. Association between CLPTM1L polymorphisms (rs402710 and rs401681) and lung cancer susceptibility: evidence from 27 case-control studies. *Molecular genetics and genomics : MGG* **289**, 1001-1012, doi:10.1007/s00438-014-0868-7 (2014).

237 15 Huang, C. C. *et al.* Concurrent gene signatures for han chinese breast cancers. *PloS one* **8**, e76421, doi:10.1371/journal.pone.0076421 (2013).

238 16 Fabijanovic, D. *et al.* The expression of SFRP1, SFRP3, DVL1, and DVL2 proteins in testicular germ cell tumors. *APMIS : acta pathologica, microbiologica, et immunologica Scandinavica* **124**, 942-949, doi:10.1111/apm.12588 (2016).

239 17 Whyteside, A. R., Hinsley, E. E., Lambert, L. A., McDermott, P. J. & Turner, A. J. ECE-1 influences prostate cancer cell invasion via ET-1-mediated FAK phosphorylation and ET-1-independent mechanisms. *Canadian journal of physiology and pharmacology* **88**, 850-854, doi:10.1139/Y10-054 (2010).

240 18 Lee, J. C. *et al.* Characterization of FN1-FGFR1 and novel FN1-FGF1 fusion genes in a large series of phosphaturic mesenchymal tumors. *Modern pathology : an official journal of the United States and Canadian Academy of Pathology, Inc*, doi:10.1038/modpathol.2016.137 (2016).

241 19 Panagopoulos, I. *et al.* Recurrent fusion of the genes FN1 and ALK in gastrointestinal leiomyomas. *Modern pathology : an official journal of the United States and Canadian Academy of Pathology, Inc*, doi:10.1038/modpathol.2016.129 (2016).

242 20 Lee, S. H., Je, E. M., Yoo, N. J. & Lee, S. H. HMCN1, a cell polarity-related gene, is somatically mutated in gastric and colorectal cancers. *Pathology oncology research : POR* **21**, 847-848, doi:10.1007/s12253-014-9809-3 (2015).

243 21 Liu, Y. *et al.* Focused Analysis of Exome Sequencing Data for Rare Germline Mutations in Familial and Sporadic Lung Cancer. *Journal of thoracic oncology : official publication of the International Association for the Study of Lung Cancer* **11**, 52-61, doi:10.1016/j.jtho.2015.09.015 (2016).

244 22 Zhou, M. J. *et al.* ISG15 inhibits cancer cell growth and promotes apoptosis. *International journal of molecular medicine* **39**, 446-452, doi:10.3892/ijmm.2016.2845 (2017).

276 23 Abdelzaher, E. & Mostafa, M. F. Lysophosphatidylcholine acyltransferase 1 (LPCAT1) upregulation in breast  
277 carcinoma contributes to tumor progression and predicts early tumor recurrence. *Tumour biology : the journal of*  
278 *the International Society for Oncodevelopmental Biology and Medicine*, doi:10.1007/s13277-015-3214-8 (2015).

279 24 Clay, M. R., Varma, S. & West, R. B. MAST2 and NOTCH1 translocations in breast carcinoma and associated  
280 pre-invasive lesions. *Human pathology* **44**, 2837-2844, doi:10.1016/j.humpath.2013.08.001 (2013).

281 25 Gee, H. E. *et al.* MicroRNA-Related DNA Repair/Cell-Cycle Genes Independently Associated With Relapse  
282 After Radiation Therapy for Early Breast Cancer. *International journal of radiation oncology, biology, physics*  
283 **93**, 1104-1114, doi:10.1016/j.ijrobp.2015.08.046 (2015).

284 26 Bell, R. B. *et al.* OX40 signaling in head and neck squamous cell carcinoma: Overcoming immunosuppression in  
285 the tumor microenvironment. *Oral oncology* **52**, 1-10, doi:10.1016/j.oraloncology.2015.11.009 (2016).

286 27 Futreal, P. A. *et al.* A census of human cancer genes. *Nature reviews. Cancer* **4**, 177-183, doi:10.1038/nrc1299  
287 (2004).

288 28 Cicek, M. S. *et al.* Epigenome-wide ovarian cancer analysis identifies a methylation profile differentiating clear-  
289 cell histology with epigenetic silencing of the HERG K<sup>+</sup> channel. *Human molecular genetics* **22**, 3038-3047,  
290 doi:10.1093/hmg/ddt160 (2013).

291 29 Finak, G. *et al.* Stromal gene expression predicts clinical outcome in breast cancer. *Nature medicine* **14**, 518-527,  
292 doi:10.1038/nm1764 (2008).

293 30 Bruheim, S., Xi, Y., Ju, J. & Fodstad, O. Gene expression profiles classify human osteosarcoma xenografts  
294 according to sensitivity to doxorubicin, cisplatin, and ifosfamide. *Clinical cancer research : an official journal of*  
295 *the American Association for Cancer Research* **15**, 7161-7169, doi:10.1158/1078-0432.CCR-08-2816 (2009).

296  
297  
298
